# Biochemical Patterns of Antibody Polyreactivity Revealed Through a Bioinformatics-Based Analysis of CDR Loops

Christopher T. Boughter<sup>1</sup>, Marta T. Borowska<sup>2</sup>, Jenna J. Guthmiller<sup>3</sup>, Albert Bendelac<sup>4</sup>,  
Patrick C. Wilson<sup>3,4</sup>, Benoit Roux<sup>2</sup>, and Erin J. Adams<sup>2,4,\*</sup>

<sup>1</sup>Graduate Program in Biophysical Sciences, University of Chicago, Chicago, IL

<sup>2</sup>Department of Biochemistry and Molecular Biology, University of Chicago, Chicago, IL

<sup>3</sup>Department of Medicine, Section of Rheumatology, University of Chicago, Chicago, IL

<sup>4</sup>Committee on Immunology, University of Chicago, Chicago, IL

\*To whom correspondence should be addressed. Email: [ejadams@uchicago.edu](mailto:ejadams@uchicago.edu)

## 1 **Abstract**

2 Antibodies are critical components of adaptive immunity, binding with high affinity to pathogenic  
3 epitopes. Antibodies undergo rigorous selection to achieve this high affinity, yet some maintain an  
4 additional basal level of low affinity, broad reactivity to diverse epitopes, a phenomenon termed  
5 “polyreactivity”. While polyreactivity has been observed in antibodies isolated from various im-  
6 munological niches, the biophysical properties that allow for promiscuity in a protein selected for  
7 high affinity binding to a single target remain unclear. Using a database of nearly 1,500 polyreactive  
8 and non-polyreactive antibody sequences, we created a bioinformatic pipeline to isolate key deter-  
9 minants of polyreactivity. These determinants, which include an increase in inter-loop crosstalk  
10 and a propensity for an “inoffensive” binding surface, are sufficient to generate a classifier able to  
11 identify polyreactive antibodies with over 75% accuracy. The framework from which this classi-  
12 fier was built is generalizable, and represents a powerful, automated pipeline for future immune  
13 repertoire analysis.

## 14 Introduction

15 Antibodies are immunogenic proteins expressed by B cells that play a major role in the adaptive  
16 immune response against non-self. Upon recognition of target epitopes, these antibodies undergo  
17 multiple rounds of somatic hypermutation and affinity maturation inside a germinal center, whereby  
18 the amino acid sequence of the epitope-binding surface is selected for optimal binding to the tar-  
19 get [1–3]. The longer this affinity maturation process extends, the higher the affinity and specificity  
20 of the antibodies towards their target antigen, primarily through mutagenesis of the six complemen-  
21 tarity determining region (CDR) loops of the antibody [1]. Using a combination of affinity matured  
22 CDR loops, these antibodies bind strongly to the target and aid in invader neutralization. While  
23 the process of affinity maturation and somatic hypermutation of antibodies results in high-affinity  
24 and incredibly specific binders to a particular epitope, some antibodies have been shown to display  
25 signs of reactivity towards diverse off-target epitopes. This broad but low-affinity binding has been  
26 termed “polyreactivity”.

27

28 Antibody polyreactivity has been hypothesized to be beneficial in the early stages of antibody  
29 maturation, acting as a pool of diverse binders ready to recognize novel antigens and initiate the  
30 more stringent selection process [4]. To this end, a majority of B cell receptors and antibodies  
31 which have not undergone somatic hypermutation, including those on immature B cells and early  
32 “natural” antibodies, have been found to be polyreactive to some extent and are suggested to have  
33 an innate-like response to pathogens [5, 6]. While these mostly unmutated polyreactive antibodies  
34 remain at low frequency in antigen-experienced individuals, a distinct population of polyreactive  
35 antibodies that have undergone selection are still expressed by mature B cells that circulate in  
36 blood [7]. In fact, some studies have found the polyreactivity status of an antibody is mostly inde-  
37 pendent of the number of somatic hypermutations in the antibody sequence [8, 9]. In line with this  
38 finding, only 5-10% of the repertoire of naive B cells circulating in the periphery are polyreactive,  
39 but this increases to 20-30% in the memory B cell compartment, showing a distinct capability of  
40 polyreactivity to survive selection [7, 10]. These results suggest that polyreactivity can persist, or  
41 perhaps even be selected for during the selection process within the germinal center.

42

43 In a few notable cases, polyreactivity may in fact augment the efficacy of a given immune response.  
44 Polyreactive IgA antibodies have been shown to have an inherent reactivity to microbiota in the  
45 mouse gut, with a predicted role in host homeostasis [11]. These previously identified antibodies so  
46 far have no known primary ligands, yet play a key role in facilitating the gut immune response to  
47 the plethora of exogenous antigens encountered in the dynamic dietary and microbial environment  
48 of the gut. This implies the existence of antibodies whose primary function is to act as polyreac-

49 tive sentries in the gut, yet the downstream effects of polyreactive antibodies coating commensal  
50 bacteria is so far unclear. Similar polyreactive IgA and IgG mucosal antibodies were found in the  
51 gut of human immunodeficiency virus (HIV) infected patients, but these antibodies either had low  
52 affinity to the virus or lacked neutralization capabilities [12]. The benefit of singular antibody  
53 sequences with the ability to sample large portions of the commensal population may represent an  
54 improvement in efficiency of the homeostatic machinery of the gut.

55

56 While the precise role of these primarily polyreactive gut antibodies is still a topic of debate,  
57 polyreactivity has been suggested to augment the immune response in other immunological niches.  
58 Broadly neutralizing antibodies (bnAbs), which bind robustly to conserved epitopes on the surface  
59 glycoproteins of influenza viruses or HIV are more likely to be polyreactive [13–15]. In one study of  
60 HIV binding antibodies, over half of all tested bnAbs were found to be polyreactive [16]. These bn-  
61 Abs have been the subject of intense study for their potential as the central components of an HIV  
62 treatment or as the byproduct of an immune response to a universal Influenza vaccine [15, 17–19].  
63 One hypothesized mechanism for the capability of polyreactive antibodies to confer this broad neu-  
64 tralization in the face of a changing viral epitope is heterologation, the ability of a single antibody  
65 to bind the primary target with one binding domain and use the other binding domain to bind  
66 in a polyreactive manner [8]. This heterologation allows the antibody to take advantage of the  
67 significant avidity increase afforded by bivalent binding, despite the low envelope protein density of  
68 HIV or a geometry which does not readily lend itself to bivalent binding on the surface of influenza  
69 viruses [20].

70

71 Although polyreactivity may play a positive role in natural immune responses, oftentimes this same  
72 property is considered undesirable from the point of view of generating therapeutic antibodies with  
73 high specificity. Antibody-based treatments, which generally take the form of an intravenous trans-  
74 fusion, are sensitive to the accelerated systemic clearance of polyreactive antibodies [21–24]. In gen-  
75 eral, much work has focused on attempting to answer the question of optimizing “developability”  
76 of a given antibody. These efforts have been dedicated to determining the most critical components  
77 of developability through a large array of experimental assays, in silico structural prediction-based  
78 methods, sequence-based analysis and their correlations with clearance, sequence-based SASA pre-  
79 dictions, and sequence-based aggregation propensity predictors [25–29]. In many of these studies  
80 polyreactivity or non-specificity in general was seen to be a negative indicator of the developability  
81 of a drug, suggesting that therapeutic antibodies should strive towards a drug-like specificity [30].

82

83 In line with this goal of understanding the predominant factors involved in the specificity of thera-  
84 peutic antibodies, many researchers have worked to identify the biophysical underpinnings of polyre-

85 activity in natural immune responses. The most popular hypotheses for the primary biophysical  
86 predictors of polyreactivity have included CDR3 length [9], CDR3 flexibility [16], net hydropho-  
87 bicity [31] and net charge [32]. More observational studies have found an increased prevalence of  
88 arginine and tyrosine in polyreactive antibodies [23, 33]. While these previous studies represent  
89 substantial advances in the study of polyreactivity, they have often been limited in scope, focusing  
90 on a singular antibody source and primarily focused on CDR3H. Comparing across these individual  
91 antibody sources highlights discrepancies between the proposed predictors of polyreactivity. The  
92 aforementioned properties determined to be key to polyreactivity in previous studies were found to  
93 be statistically insignificant in studies of HIV-binding and mouse gut polyreactive antibodies [8,11].

94

95 Clearly, a computational framework that would enable us to predict the polyreactivity of a given  
96 antibody *a priori*, whether evaluating the efficacy of a natural immune response or the potential  
97 fate of a therapeutic antibody, would be tremendously useful. Such a framework, for example,  
98 could be used to assist in the isolation of broadly neutralizing anti-viral antibodies, or speed up  
99 the process of therapeutic antibody screening. To achieve this goal, a thorough understanding  
100 of the molecular features behind polyreactive binding interactions is critical. Experimental ap-  
101 proaches utilizing next-generation sequencing and ELISA allow for the identification of hundreds  
102 of polyreactive antibody sequences. However, the systematic characterization of these antibodies is  
103 difficult. More detailed biochemical studies of polyreactive antibodies via protein crystallography,  
104 quantitative binding experiments, and mutagenesis provide exceptional insight but are inherently  
105 low throughput. Structural modeling of these polyreactive antibodies represent a high throughput  
106 approach, but models of flexible loops are relatively unreliable, and are unlikely to capture nuances  
107 in side-chain placement [34]. A bioinformatics-based approach, centered around high through-  
108 put analysis that minimizes structural assumptions while maintaining positional context of amino  
109 acid sequences would provide a thorough, unbiased analysis of existing data and create a powerful  
110 pipeline for future studies.

111

112 In this study, we show that, using just the amino acid sequences of antibodies from a database  
113 of nearly 1,500 polyreactive and non-polyreactive sequences, unifying biophysical properties that  
114 distinguish polyreactive antibodies from non-polyreactive antibodies can be identified. We find  
115 that, while charge and hydrophobicity are in fact important determinants of polyreactivity, the  
116 characteristic feature of polyreactive antibodies appears to be a shift towards neutrality of the  
117 binding interface. In addition, loop crosstalk is more prevalent in the heavy chain of polyreactive  
118 antibodies than non-polyreactive antibodies. From these properties, a machine learning-based  
119 classification software was developed with the capability to determine the polyreactivity status of  
120 a given sequence. This software is generalizable and can be re-trained on any binary classification

121 problem and identify the key differences between two distinct populations of antibodies, T cell  
122 receptors, or MHC-like molecules at the amino acid level. As a test case, the same analysis was  
123 applied to a dataset of therapeutic antibodies, demonstrating the overall flexibility of the software  
124 generated in this study.

## 125 Results

### 126 Database

127 Our aggregate database of nearly 1,500 antibody sequences is compiled from our own previously  
128 published and new data, published studies by the Mouquet and Nussenzweig labs, and the thera-  
129 peutic antibody database TheraSabDab (Table 1) [8, 11, 12, 14, 16]. Using an ELISA-based assay,  
130 the reactivity of each antibody is tested against a panel of 4-7 biochemically diverse target anti-  
131 gens: DNA, Insulin, lipopolysaccharide (LPS), flagellin, albumin, cardiolipin, and keyhole limpet  
132 hemocyanin (KLH). This panel has become increasingly prevalent in the literature for experimen-  
133 tal measures of polyreactivity in antibodies [8, 9, 11, 12, 14–16, 25, 35, 36]. The ligands represent a  
134 diverse sampling of biophysical and biochemical properties; for example, enrichment in negative  
135 charge (DNA, insulin, LPS, albumin), amphipathic in nature (LPS, cardiolipin), exceptionally po-  
136 lar (KLH), or large in size (KLH, flagellin). From this panel, a general rating of “polyreactive” or  
137 “non-polyreactive” is given to 529 and 524 antibodies, respectively. For the purposes of this study,  
138 antibodies are determined to be polyreactive if the authors of the original studies determined a  
139 particular clone binds to two or more ligands in the panel. Those that bind to one or none of  
140 the ligands in the panel are deemed non-polyreactive. The nearly 500 therapeutic antibodies are  
141 treated separately, as many of these sequences either are not measured for polyreactivity or use a  
142 different metric as a measure of polyreactivity. The results presented below utilize this dataset of  
143 1053 non-therapeutic antibody sequences, unless otherwise noted.

| Dataset            | Polyreactive | Non-Polyreactive | Total |
|--------------------|--------------|------------------|-------|
| Mouse IgA          | 205          | 240              | 445   |
| HIV Reactive       | 172          | 124              | 296   |
| Influenza Reactive | 152          | 160              | 312   |
| Therapeutics       | -            | -                | 434   |
|                    | 529          | 524              | 1487  |

Table 1: A quantification of the antibodies used in this study.

## 144 A Surface-Level Analysis of Polyreactive Antibody Sequences

145 As a first pass at the given dataset, we focus on the most simplistic of the possible explanations  
 146 for differences between polyreactive and non-polyreactive antibodies, specifically the J- and V-gene  
 147 usage of each group. Figure 1A and 1B, rendered with code adapted from the Dash et. al. derived  
 148 program TCRdist [37], represents each antibody V-gene as a line connecting a single heavy and  
 149 light chain gene for the human-derived antibodies (685 sequences).

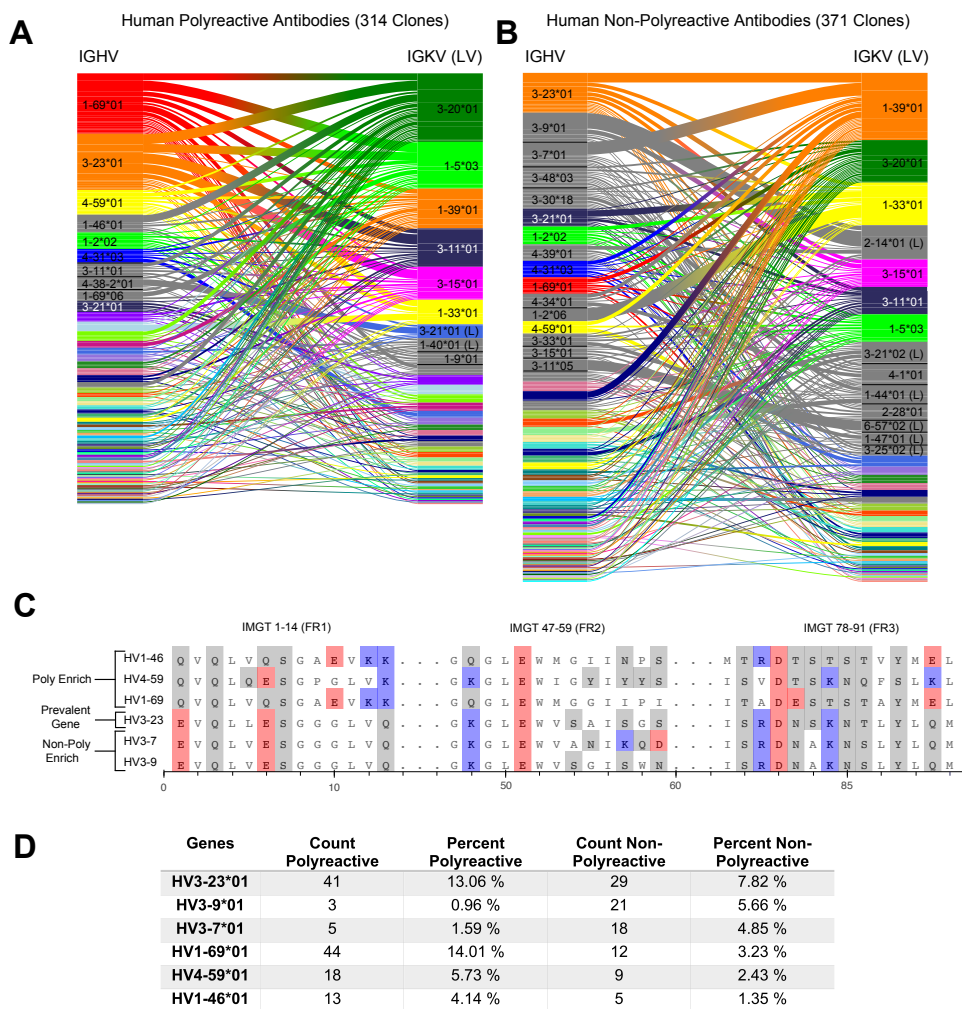

Figure 1: A comparative genetic analysis of human-derived polyreactive and non-polyreactive antibody sequences uncovers population level differences. Gene usage diagrams comparing (A) human polyreactive and (B) non-polyreactive sequences show a qualitative difference in the VH gene usage. Shared colors indicate identical genes, grey indicates genes that are not seen in the other population at a level over 2%. Unlabeled genes are colored randomly to highlight genetic variation in the populations. (C) Sequence alignment of the most prevalent genes in the polyreactive and non-polyreactive populations compared to a reference gene common to each population. Hydrophobic amino acids are colored white, hydrophilic amino acids are colored grey, and positively or negatively charged amino acids are colored blue or red, respectively. (D) Percentage and raw count of observed gene usage for the polyreactive and non-polyreactive sequences.

150 Direct comparisons between mouse and human derived antibodies is difficult at the gene usage  
151 level. A similar analysis highlighting differences between mouse polyreactive and non-polyreactive  
152 antibodies can be found in the supplement (Figure S1).

153

154 Genes are identified from nucleotide sequences using NCBI's IgBLAST command line tool [38].  
155 Heavy and light chain genes that are shared between polyreactive and non-polyreactive sequences  
156 are colored for the top labelled instances. Genes which are labelled but not found above a 2%  
157 threshold in the opposite population are colored grey, while those that do not have a visible name  
158 are colored randomly to highlight variation in gene usage. From this comparison, it is clear that  
159 the variable gene usage is skewed between polyreactive and non-polyreactive sequences, with an  
160 enrichment of  $V_H1-69$ ,  $V_H1-46$ , and  $V_H4-59$  in the polyreactive population. In contrast, no quali-  
161 tative differences in the J-gene usage are readily discernible between these two groups (Figure S2).

162

163 While the full alignment of these most used heavy chain variable genes shows a high degree of  
164 sequence similarity (Figure S3), Figure 1C highlights the regions of highest dissimilarity between  
165 the biophysical properties of amino acids in prevalent genes within each population.  $V_H3-23$ , the  
166 most prevalent gene in the non-polyreactive human dataset and the second most prevalent gene in  
167 the polyreactive human dataset, can be used as a reference for comparisons between genes enriched  
168 in each individual population. This reference gene shares a high degree of sequence similarity with  
169 the second and third most frequently occurring genes in the non-polyreactive dataset,  $V_H3-7$  and  
170  $V_H3-9$ , save for a lysine and glutamic acid pair in framework 2 of  $V_H3-7$ . The genes enriched in the  
171 polyreactive dataset, however, are quite different from this reference. All three of the polyreactive  
172 enriched genes have charged residues where the non-polyreactive enriched genes have hydrophilic  
173 residues (or vice versa) at IMGT positions 1, 13, and 88. These initial results hint at some system-  
174 atic differences between the polyreactive and non-polyreactive antibody populations.

175

176 Figure 1D quantifies the extent of the difference in gene usage in each population by comparing  
177 these most prominent genes from our accumulated dataset of HIV- and influenza virus-reactive  
178 antibodies. While the two most common genes in the polyreactive dataset account for 27% of  
179 the human polyreactive antibodies in this study, the top three most common genes in the non-  
180 polyreactive dataset account for just over 17% of the total population. In addition to being the  
181 most prevalent gene in the polyreactive dataset,  $V_H1-69*01$  has also been found historically to be  
182 more prevalent in broadly neutralizing antibodies against influenza viruses, in line with the previ-  
183 ously mentioned overlap between bnAbs and polyreactivity [15, 36].

184

185 Overall, there is a noticeable difference between the gene usage frequency of polyreactive and non-

186 polyreactive antibodies, but the overlap in the usage of the two populations suggests that gene  
187 usage alone is not sufficient to distinguish the two groups. While there exist qualitative differences  
188 between framework sequences enriched in the polyreactive dataset compared to the non-polyreactive  
189 population, a look at the amino acid usage of the CDR loops of each group shows no significant  
190 differences (Figure S4). This implies that the positional context of a given amino acid is critical to  
191 tease out differences in antibody binding properties.

## 192 **A Position Sensitive Matrix Representation of Sequences Provides Further In-** 193 **sights into Polyreactivity**

194 To identify deeper trends in the biophysical properties of polyreactive antibodies, we utilize a new  
195 methodology to analyze and represent a range of different properties inherent to these sequences.  
196 While the framework regions of antibodies are highly conserved, the CDR loops vary significantly in  
197 length and show very low conservation between populations. This makes alignment of CDR loops  
198 difficult without creating subgroups for loops of identical length. To overcome this, the sequence  
199 data is re-organized into a matrix representation (Figure 2A). Each sequence is aligned by the  
200 center of each CDR loop, with spaces between the loops set to zero and each amino acid encoded  
201 as a number from 1 to 21. While this alignment method excludes the framework regions of the  
202 antibodies and slightly averages out some of the properties at the edge of the CDR loops, we reason  
203 that most of these differences are evident in the gene usage analysis of the previous section. From  
204 this simple alignment, no obvious patterns emerge separating polyreactive and non-polyreactive an-  
205 tibodies, however we can clearly see that mouse gut-derived IgA antibodies have generally shorter  
206 CDR3H loops, and more conserved CDR3L sequences when compared to the human-derived anti-  
207 body sequences. All subsequent analysis is derived from this matrix representation of the sequences.

208

209 With this new positionally sensitive and quantitative alignment method, we are able to further  
210 dissect the differences in amino acid sequences presented in Figure 1. Figure 2B uses this posi-  
211 tional sequence encoding to determine the amino acid frequency difference between polyreactive and  
212 non-polyreactive sequences. For example, phenylalanine is found at position 93 in roughly 40% of  
213 polyreactive sequences and nearly 60% of non-polyreactive sequences. Therefore position 93, amino  
214 acid F has an intensity of -0.2 in Figure 2B. From this panel it is evident that most of the major  
215 differences are in the germline encoded regions CDR1H and CDR2H, in line with the observations  
216 from Figure 1 that suggest polyreactive antibodies have a distinct gene usage when compared to  
217 non-polyreactive antibodies. Figure 2C further expands on these differences, showing the largest  
218 changes in amino acid frequencies between the two populations. We can see that there is a slight  
219 decrease of phenylalanine frequency in CDR1H of polyreactive antibodies, in favor of isoleucine.  
220 Additionally, there is a general shift towards hydrophobicity in CDR2H, as the hydrophilic residue



221 serine at matrix positions 78 and 82 is less prevalent in polyreactive antibodies, instead replaced  
 222 by the more hydrophobic residues isoleucine and glycine.

223

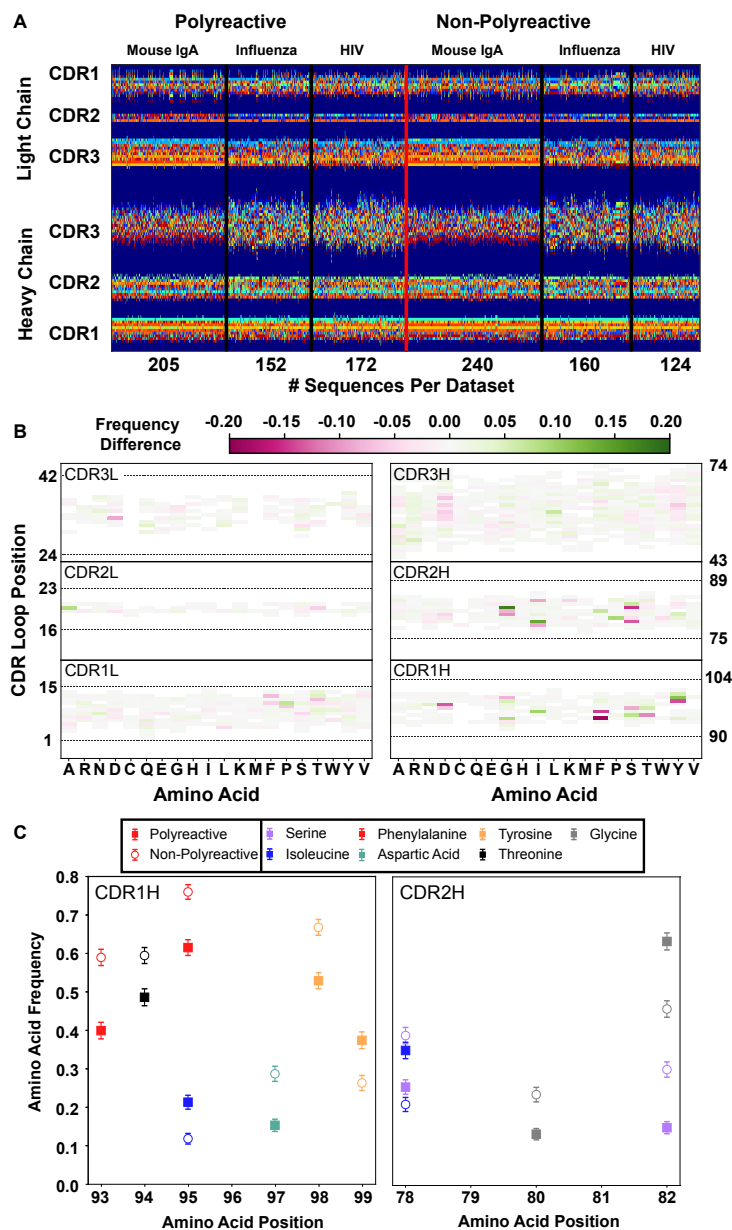

Figure 2: A new representation of CDR loop sequences improves the position-sensitivity of quantitative antibody analysis. (A) Matrix representation of the amino acid sequences used in this study provides a framework for further analysis. Each amino acid is encoded as a number from 1 to 21, represented by a distinct color in the matrix. A 0-value is used as a buffer between loops and is represented by the dark blue regions. The red line separates polyreactive and non-polyreactive sequences. (B) Amino acid frequency difference between polyreactive and non-polyreactive sequences for all six CDR loops. Residues more common in polyreactive sequences are shown in green, while those more common in non-polyreactive sequences are shown in pink. Loop positions correspond to the numerical position within the matrix of panel A. (C) An in-depth representation highlighting the amino acid frequencies used to create panel B. Only frequency changes greater than 10% are shown for clarity.

224 This increased prevalence in loop hydrophobicity of polyreactive antibodies has been suggested  
 225 before in the literature [16] along with a net increase in positive charge [32], so we next aimed  
 226 to analyze this matrix systematically using biophysical properties inherent to the loops. A simple  
 227 analysis of the full human and mouse-derived dataset investigating classical parameters explored  
 228 previously by other groups (CDR loop length, net charge, net hydrophobicity, and gene usage)  
 229 and some new properties (side chain flexibility, side chain bulk, and Kidera Factors [39]) show  
 230 some significant differences between polyreactive and non-polyreactive antibodies (Figure 3A,B).  
 231 The versatility of the positionally sensitive amino acid matrix allows for the application of multiple  
 232 "property masks" to tease out the specific regions of each CDR loop that contributes most to these  
 233 significant differences. Given a property, amino acid charge for example, we can replace each simple  
 234 1-21 representation with a distinct representation based upon amino acid properties.

235

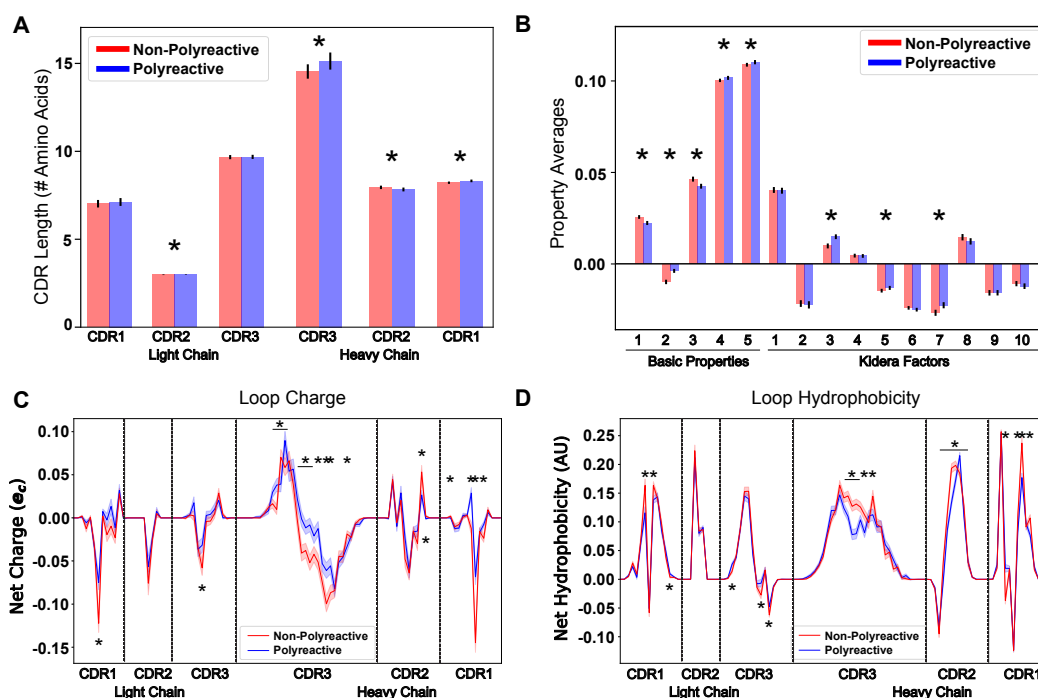

**Figure 3: Position-sensitive quantification of CDR loop properties of mouse and human antibody sequences highlights differences between polyreactive and non-polyreactive populations.** Plotting the average CDR loop lengths (A) and net antibody biophysical properties (B) show small but significant differences when analyzed in bulk. Basic properties 1-5 are hydrophobicity1, charge, hydrophobicity2, side chain flexibility, and side chain bulk. Plotting the average net charge (C) and hydrophobicity (D) as a function of position of polyreactive and non-polyreactive sequences highlights significant differences in CDR3H. Light shadow around lines represent bootstrap standard errors. All uncertainties obtained via bootstrapping. Stars indicate p-value  $\leq 0.05$  calculated via nonparametric Studentized bootstrap test. Bars with a single star above represent contiguous regions of significance.

236 In the matrix of Figure 2A leucine, histidine, and arginine are represented by the integers 3, 16,  
 237 and 17. As an example, when the charge property mask is applied, the matrix representations

238 of these three amino acids in all sequences is changed to 0.00, 0.091, and 1.00, respectively. We  
239 apply 62 such masks to this matrix, including simple metrics like charge, hydrophobicity, side chain  
240 flexibility, and side chain bulkiness to go along with more carefully curated metrics from the works  
241 of Kidera et. al. and Liu et. al [39,40]. A complete description of these properties can be found in  
242 Supplemental Table 1. The application of these masks gives an entirely new matrix describing the  
243 localization of amino acids with a given property.

244

245 By averaging across all sequences in the polyreactive or non-polyreactive dataset when these masks  
246 are applied, we can readily see differences in charge patterning and hydrophobicity when com-  
247 paring polyreactive and non-polyreactive sequences (Figure 3C,D). Including errors obtained via  
248 bootstrapping, we see that these differences are most pronounced in the center of CDR3H, with  
249 some differences also apparent in the remaining five loops. This analysis shows an overall bias  
250 towards neutrality (i.e. neither positively nor negatively charged, neither strongly hydrophilic nor  
251 hydrophobic) in these regions. These results also contextualize the findings of Figure 2C. The  
252 trend towards hydrophobic residues in CDR2H of polyreactive antibodies importantly does not  
253 make these regions net hydrophobic, but instead make these regions slightly less hydrophilic on  
254 average.

## 255 **Systematic Determination of the Key Contributions to Polyreactivity**

256 Along with simple property averaging, these masks also give a high dimensional space from which  
257 we can determine, in an unbiased way, the primary factors that discriminate polyreactive and non-  
258 polyreactive antibodies. As a first pass, we apply a principal component analysis (PCA) to the  
259 matrix of all antibody sequences in an attempt to separate the polyreactive or non-polyreactive  
260 populations along the axes of highest variation in the dataset. Unfortunately, the principal com-  
261 ponents of these data do not effectively distinguish between the two populations (Figure S5).

262

263 To further investigate the physical and sequence-based properties of polyreactivity in antibodies in  
264 a more targeted manner, we employ linear discriminant analysis (LDA), a common technique often  
265 applied in classification problems [41–43]. LDA works in a manner conceptually similar to PCA,  
266 reducing the dimensionality of a given dataset via a linear combination of the original dimensions.  
267 However, LDA takes one additional input, the label or class of each sequence. Whereas the objec-  
268 tive of PCA is to identify the axes which maximize the variance in the dataset, LDA has the dual  
269 objective of maximizing the projected distance between two classes while minimizing the variance  
270 within a given class. While LDA is more well adapted for classifying two distinct populations, it  
271 is susceptible to overfitting, unlike PCA [44]. Here, we have labelled our two classes in the matrix

272 with either a “1” for polyreactive, or “0” for non-polyreactive. In our application of LDA we parse  
273 down the large number of input vectors using either PCA or an algorithm which selects the vectors  
274 with the largest average differences between the two populations. This reduction in dimensionality  
275 ensures the data are not being overfit, and the tunable number of input vectors allows us to control  
276 for overfitting in each individual application.

277

278 Figure 4A shows the results of LDA when applied to a parsed dataset comprised of 311 polyreactive  
279 antibodies and 362 non-polyreactive antibodies. A limitation of the full human and mouse-derived  
280 polyreactivity dataset is that there exists an intermediate between the two classes. It is not imme-  
281 diately obvious where the line for polyreactivity should be drawn. An antibody that binds to 2-3  
282 ligands may not necessarily achieve broad reactivity through the same mechanism as an antibody  
283 that binds 4 or more ligands from a panel of 6 or 7. To remove these ambiguities, in this parsed  
284 dataset we denote antibodies that bind 4-7 ligands as polyreactive, antibodies that bind 0 panel  
285 ligands as non-polyreactive, and those that bind 1-3 are removed from the analysis.

286

287 LDA analysis is versatile in its applications, and in this work we utilize the method in two distinct  
288 modes. In the first mode, all of the available data is used as input with the output vector repre-  
289 senting the features that best distinguish between the two complete populations. Plots of the data  
290 projected onto this vector (as in Figure 4A) represent the maximum achievable separation between  
291 the two populations for a defined number of input components from the given biophysical property  
292 matrix. In the second mode, we utilize LDA as a more canonical classification algorithm separat-  
293 ing the data randomly into training and test groups. In this classification mode of operation, a  
294 combination of correlation analysis coupled with maximal average differences is used to parse input  
295 features, and a support vector machine (SVM) is used to generate the final classifier from these  
296 features. Accuracy of the resultant classifiers is assessed via leave one out cross validation, these  
297 accuracies are shown in Figure 4B.

298

299 In the first mode, we find that the data can be split more effectively when the parsed dataset is  
300 broken up into the distinct “reactivity” groups, i.e. those antibodies specific for influenza viruses,  
301 HIV, or found in the mouse gut (Figure 4A). This suggests there may be some bias due to antigen  
302 specificity, or lack thereof, whereby influenza virus-specific antibodies take a slightly different path  
303 towards polyreactivity compared to HIV reactive or mouse gut IgA antibodies. However, when  
304 using the classification mode, the classification accuracy is roughly equivalent across all tested  
305 datasets (Figure 4B). Testing this classifier with a scrambled dataset, where the labels are ran-  
306 domly assigned, shows the expected decrease in classification accuracy for each individual dataset  
307 for all ranges of input features.

308

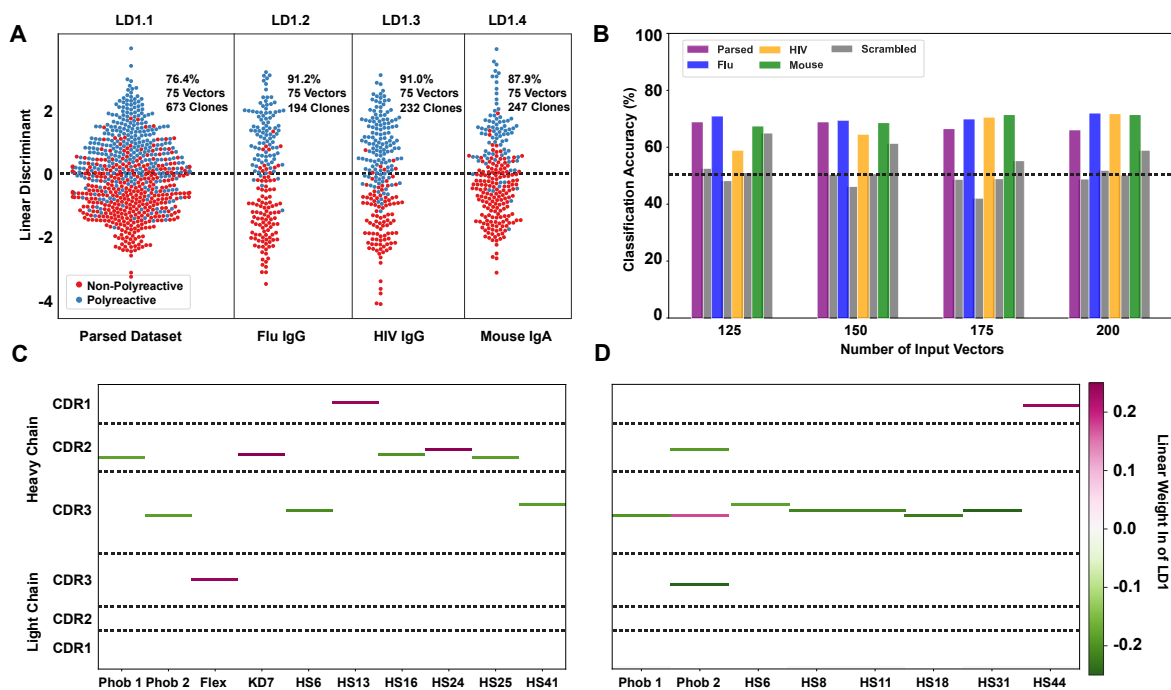

Figure 4: **Linear discriminant analysis (LDA) can meaningfully separate the two populations and these meaningful differences can be used to generate a polyreactivity classifier.** LDA applied individually to the complete parsed, Influenza, HIV, and mouse datasets. Percentages indicate the accuracy of the linear discriminant in labelling polyreactive and non-polyreactive antibodies. For these data, the plotted linear discriminants are comprised of different linear weights. (B) Accuracies of a polyreactivity classifier with a separate test and training dataset. Groupings in this figure are the same as those in panel A. A support vector machine is generated for each individual population, and the reported values are accuracies calculated through leave one out cross validation. Shown are test data and a scrambled dataset where the labels of “polyreactive” or “non-polyreactive” are applied randomly (grey bars). The dotted line indicates 50% accuracy threshold. (C) Property matrices highlighting the top 10 weights of the linear discriminants in panel A for the parsed dataset with 75 vectors (C) and the HIV dataset with 75 vectors (D). Color bar represents the normalized weight of each property, where pink rectangles represent properties positively correlated with increased polyreactivity, and green rectangles represent properties negatively correlated with decreased polyreactivity. For clarity, only the top ten linear weights are included. The full matrix of this data can be found in supplemental Figure S6.

309 When applying LDA in the first mode (Figure 4A), we can directly pull the linear weights of each  
 310 component comprising linear discriminant 1 and reveal which biophysical properties at each CDR  
 311 position best distinguish between the two populations. The differences in the linear weights from  
 312 the heavy chain CDR loops comprising each discriminant show clear differences when comparing the  
 313 complete parsed dataset (Figure 4C) to the HIV only dataset (Figure 4D). In the parsed dataset,  
 314 the discriminating weights are heavily concentrated in CDR2H. Whereas in the HIV dataset, these  
 315 weights are centered around the CDR3H loop. Only the top ten linear weights are shown in

316 Figure 4C,D. The full matrix of linear weights can be found in Figure S6. The predominant  
317 discriminating factors between datasets might be due to the significant difference in CDR3H length  
318 between the mouse (IgA) and the human datasets, which confounds the analysis in this region.  
319 However, when examining each individual subset of the complete dataset we do find that there are  
320 common properties that seem to be the primary discriminators (i.e. largest linear weights). These  
321 are hydrophobicity 1, hydrophobicity 2, and hotspot variable 6 (a structural parameter related to  
322 alpha-helix propensity).

## 323 **An Information Theoretic Approach**

324 While analysis of the biophysical property differences between polyreactive and non-polyreactive  
325 sequences provides some insight into the molecular basis for the polyreactivity phenomenon, a  
326 broad unifying pattern which could discern the biophysical mechanism behind polyreactivity was  
327 not readily evident across all types of antibodies. To probe these polyreactive sequences in a quan-  
328 titative yet more coarse manner, we applied the formalism of information theory to our dataset  
329 of antibody sequences. Information theory, a theory classically applied to communication across  
330 noisy channels, is incredibly versatile in its applications, with high potential for further applications  
331 in immunology [45–50]. In this work, we utilize two powerful concepts from information theory,  
332 namely Shannon entropy and mutual information.

333

334 Shannon entropy, in its simplest form, can be used as a proxy for the diversity in a given input  
335 population. This entropy, denoted as  $H$  has the general form:

$$H(X) = - \sum_X p(x) \log_2 p(x) \quad (1)$$

336 Where  $p(x)$  is the occurrence probability of a given event, and  $X$  is the set of all events. We can  
337 then calculate this entropy at every position along the CDR loops, where  $X$  is the set of all amino  
338 acids, and  $p(x)$  is the probability of seeing a specific amino acid at the given position. In other  
339 words, we want to determine, for a given site in a CDR loop, how much diversity (or entropy) is  
340 present. Figure 5A shows this Shannon entropy distribution for the full dataset of polyreactive  
341 and non-polyreactive antibodies. Given there are only 20 amino acids used in naturally derived  
342 antibodies, we can calculate a theoretical maximum entropy of 4.2 bits, which assumes that every  
343 amino acid occurs at a given position with equal probability. Although the observed entropy of the  
344 CDR3H loop approaches this theoretical maximum, it hovers below it (3.5 Bits) due to the relative  
345 absence of the amino acids cysteine and proline in the center of this loop. The difference in the  
346 entropy distributions in CDR1H are consistent with the bias in amino acid usage in this region,  
347 shown previously in Figure 2.

348

349 Importantly, from this entropy we can calculate an equally interesting property of the dataset,  
350 namely the mutual information. Mutual information is similar, but not identical to, correlation.  
351 Whereas correlations are required to be linear, if two amino acids vary in any linked way, this will  
352 be reflected as an increase in mutual information. In addition, due to some of the highly conserved  
353 residues in the non-CDR3H loops, high covariance can be achieved for residues that have not been  
354 specifically selected for in the germinal center. Using this information theory framework, these  
355 conserved residues have a mutual information of 0. Overall, the mutual information can be used to  
356 identify patterns in antibody sequences that were not readily evident through the previous analysis  
357 in this or other studies. If there is some coevolution or crosstalk between residues undergoing some  
358 selection pressure in the antibody maturation process, it will be reflected as an increase in the  
359 mutual information.

360

361 In this work, mutual information  $I(X; Y)$  is calculated by subtracting the Shannon entropy de-  
362 scribed above from the conditional Shannon entropy  $H(X|Y)$  at each given position as seen in  
363 equations 2 and 3:

$$H(X|Y) = - \sum_{y \in Y} p(y) \sum_{x \in X} p(x|y) \log_2 p(x|y) \quad (2)$$

$$I(X; Y) = H(X) - H(X|Y) \quad (3)$$

364 To orient ourselves in physical space, Figure 5B gives an example crystal structure (PDB: 5UGY)  
365 [51] highlighting the lateral arrangements of the CDR loops. The matrix in Figure 5C shows that  
366 the mutual information between CDR loops on this binding surface is increased in the heavy chains  
367 of polyreactive antibodies over non-polyreactive ones, suggesting there exists more loop crosstalk  
368 in antibodies that exhibit polyreactivity. Interestingly, it appears that there is a corresponding  
369 decrease of loop crosstalk in the light chains of polyreactive antibodies. This observed crosstalk  
370 persists across all polyreactive antibodies within all subsets of our tested dataset and is evident  
371 both in intra-loop and inter-loop interactions. Figure 5D highlights some examples of the interest-  
372 ing significant differences of this crosstalk at distinct given positions within CDR1H and CDR3H.  
373 A complete plot of the statistically significant differences ( $p \leq 0.05$ ) of Figure 5C (Figure S7) shows  
374 that a large portion of these differences are in fact significant.

375

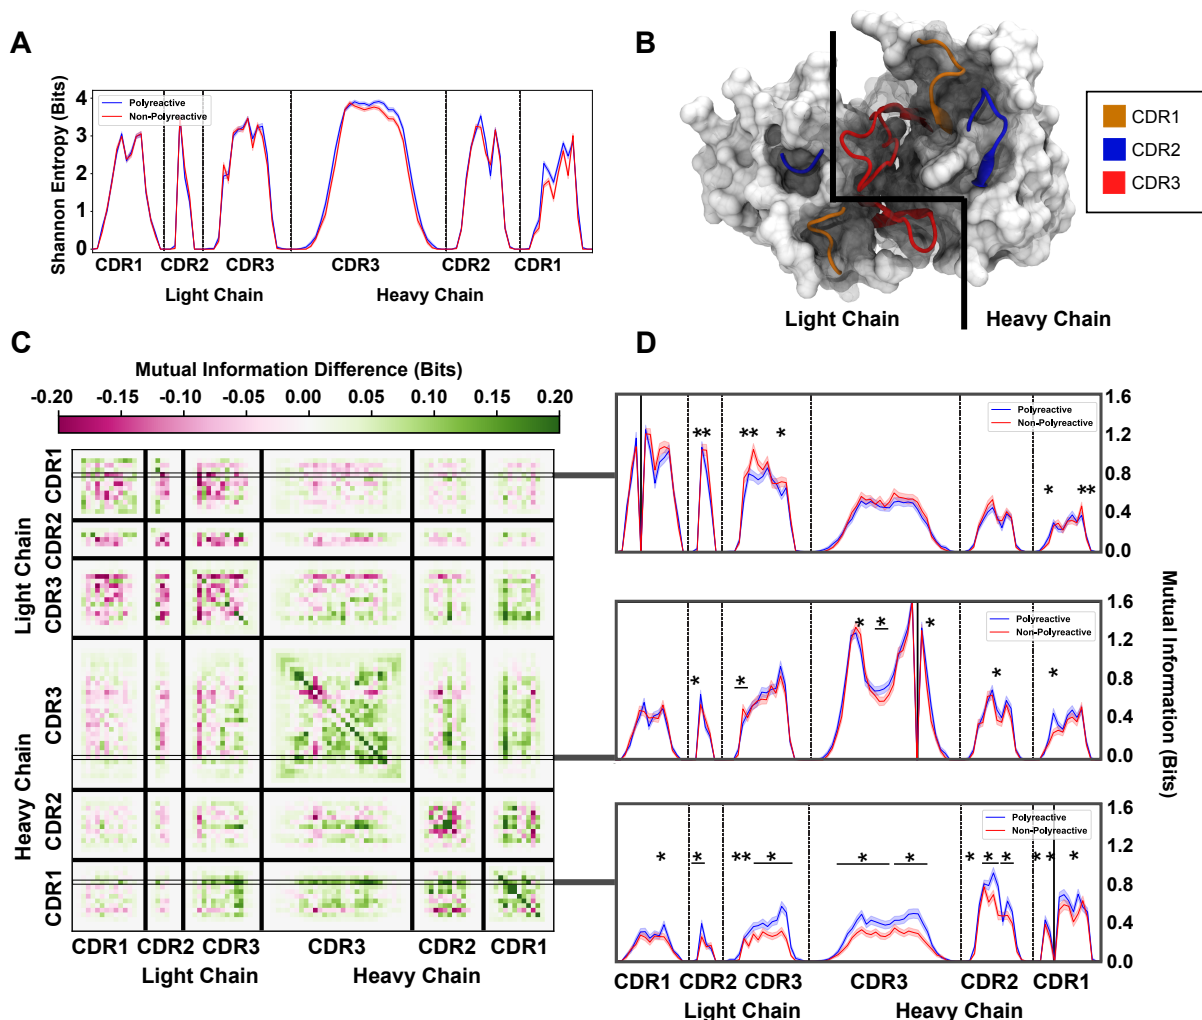

Figure 5: An information theoretic analysis of antibody sequences shows an increase in polyreactive antibody loop crosstalk. (A) The sequence diversity of the polyreactive and non-polyreactive datasets, quantified using Shannon Entropy, highlight similar diversities between the two groups. (B) A crystal structure (PDB: 5UGY) provides a visual representation of the lateral organization of the CDR loops on the antibody binding surface. (C) The difference in mutual information between polyreactive and non-polyreactive sequences shows that CDR loops of the heavy chain have more crosstalk in polyreactive antibodies. Each individual row represents the given condition, whereas each column gives the location the mutual information is calculated. (D) Singular slices of the mutual information show the data in (C), projected from the matrix onto a line, highlighting the significance of the differences at these particular locations. The positions of the “given” amino acid, i.e. the particular  $Y$  in  $H(X|Y)$ , are highlighted by grey boxes in panel C. Solid black lines indicate where on the X-axis this “given” amino acid is located. Stars indicate statistical significance ( $p \leq 0.05$ ) calculated through a nonparametric permutation test. Bars with a single star above represent contiguous regions of significance.

376 The ordering of these entropy and information plots was chosen to reflect the spatial arrangement  
 377 of the loops on the antibody surface; as such they show also that mutual information between loops  
 378 drops off with physical distance between these loops. In other words, loops (and residues) that are  
 379 located close to each other will have more of an effect on their direct neighbors as opposed to those



380 that are more physically distant. This increased mutual information suggests that in the heavy  
381 chains of polyreactive antibodies, there is enhanced cooperativity or co-evolution of the amino acids  
382 of intra- and inter-CDR loop pairs.

### 383 **Application to Therapeutic Antibodies**

384 As discussed previously, many studies on antibody repertoires specific to a given target have also  
385 revealed polyreactivity in these binders. Given the architecture of the software built around this  
386 bioinformatic analysis of polyreactivity in natural immune responses, the identical treatment of  
387 therapeutic antibodies is a logical next step. Using the published experimental tests of Jain &  
388 Sun et. al. and the extensive database provided by Thera-SAbDab we were able to compare the  
389 polyreactivity of a natural immune response with that seen in therapeutic antibodies [25, 52, 53].

390

391 Figure 6A shows the extent to which a linear discriminant trained on the parsed polyreactivity  
392 dataset can effectively discriminate approved and discontinued antibody therapeutics. From these  
393 plots we see that polyreactivity status of naturally-derived antibodies does not correlate well with  
394 the acceptance or discontinuation of a therapeutic antibody. Additionally, the polyreactivity sta-  
395 tus of naturally-derived antibodies correlates poorly with the reported polyreactivity of therapeutic  
396 antibodies (Figure S8). Importantly however, polyreactivity for these therapeutic antibodies is re-  
397 ported in a different manner compared to the other antibodies in this study. Rather than a count  
398 of the number of ligands the antibody reacts to, the polyreactivity is reported as an average score.  
399 Re-training the linear discriminant on these therapeutic antibodies (Figure 6B), shows an ability  
400 to split the approved and discontinued antibodies with an accuracy of 76% when using LDA mode  
401 1 with 15 input vectors. While the software does seem able to effectively split approved and dis-  
402 continued therapeutic antibodies to some extent, the biophysical properties which are effectively  
403 creating this split are not as obvious as in the case of polyreactive and non-polyreactive naturally  
404 derived antibodies.

405

406 Both the position-sensitive charge and hydrophobicity (Figure S9) show no significant differences  
407 between approved and discontinued antibodies. Plotting the linear weights of LD1 from Figure 6B,  
408 we can see that the primary discriminating factors between approved and discontinued antibodies  
409 are unsurprisingly centered around CDR3H. Significant differences can be seen in the CDR3H  
410 average value of Kidera Factor 7, a metric based upon side chain partial specific volume (Figure  
411 6D). Overall, the software can meaningfully separate and analyze a binary split between groups,  
412 demonstrating its applicability to a broad array of sequence analyses.

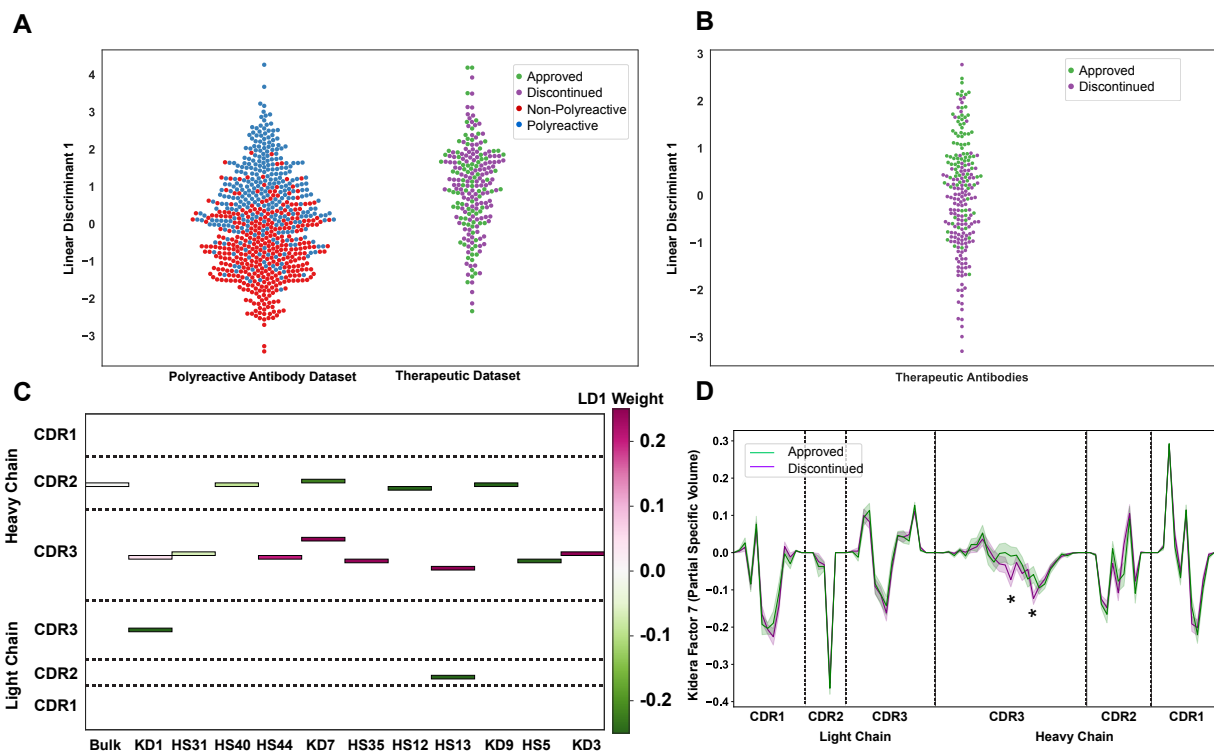

Figure 6: **An application of the linear discriminant analysis module of the software to therapeutic antibodies highlights the broad applicability of this analysis.** (A) A linear discriminant generated using the parsed naturally-derived antibody dataset applied to approved and discontinued therapeutic antibodies. (B) Projection of the approved and discontinued antibodies onto a linear discriminant trained on that data. (C) The location and intensity of the linear weights of the linear discriminant in panel B highlight the properties that best split the approved and discontinued antibodies. (D) Position sensitive plot of Kidera Factor 7, for approved and discontinued therapeutic antibodies. Stars indicate significance of  $p \leq 0.05$ , calculated via one-sided non-parametric bootstrap test. Error bars calculated using the bootstrapped standard deviation.

## 413 Discussion

414 Previous research has highlighted the importance of hydrophobicity, charge, and CDR loop flex-  
 415 ibility on antibody specificity. In this work, we expand upon these previous results with a new  
 416 bioinformatic and biophysical characterization of polyreactive antibodies. The software generated  
 417 for this study provides a powerful computational tool which can be utilized by researchers inter-  
 418 ested in discerning differences between populations of adaptive immune molecules in broad contexts.  
 419 Building off of the efforts of our own work and that of experimental collaborators, we were able  
 420 to aggregate to date one of the largest publicly available datasets of antibodies tested for polyre-  
 421 activity. Differences in the germline gene frequency and amino acid frequencies show there exists  
 422 some underlying differences between polyreactive and non-polyreactive antibodies. A surface level

423 analysis of this dataset is able to discriminate certain features of polyreactive and non-polyreactive  
424 antibodies, namely that on average, polyreactive antibodies are less strongly negatively charged,  
425 less hydrophilic, and have a higher prevalence of antibodies with longer CDR loops of the heavy  
426 chain. Importantly, however, these binding surfaces do not have a net positive charge nor are they  
427 net hydrophobic.

428

429 To dig deeper into the biophysical differences between polyreactive and non-polyreactive antibod-  
430 ies, we created an adaptable software for the automated analysis of large antibody datasets and  
431 the application of a new analysis pipeline for the study of polyreactive antibodies. Overall, the  
432 improvements of this software to the current state of antibody sequence analysis are sufficient to  
433 highlight key differences in the two populations with improved spatial resolution. The position  
434 sensitive sequence alignment is able to further parse through the genetic differences and show that  
435 in general, polyreactive antibodies have a tendency to have more hydrophobic residues in CDR2H,  
436 and a decreased preference for phenylalanine in CDR1H. While these observational differences pro-  
437 vided some initial insight, a more rigorous biophysical treatment was necessary. With the addition  
438 of 62 biophysical properties analyzed using the position sensitive alignment, significant differences  
439 between the CDR3H loops in polyreactive and non-polyreactive antibodies became immediately  
440 evident, providing a more detailed depiction of the antigen binding surface of polyreactive antibod-  
441 ies.

442

443 These data suggest a movement towards neutrality or “inoffensive” residues in the CDR loops of  
444 polyreactive antibodies: amino acids that are neither exceptionally hydrophobic nor hydrophilic  
445 and with a net charge close to 0. Previous studies have suggested that polyreactive antibodies tend  
446 to have more hydrophobic CDR loops, such that low affinity Van der Waals interactions might  
447 be the primary means of polyreactive interactions [16, 30]. However, these studies counted the  
448 number of hydrophobic residues per sequence or averaged the hydrophobicity of all six CDR loops.  
449 While our results partially agree with these previous findings, our analysis extends much further  
450 into defining the biophysical basis of this phenomenon. For example, while our position sensitive  
451 representation of the sequences shows that CDR3H does become more hydrophobic in polyreactive  
452 sequences, it is still net hydrophilic on average. A highly hydrophobic binding surface would pro-  
453 vide an avenue for non-specific interactions with other hydrophobic proteins, but it would occlude  
454 binding to highly hydrophilic ligands like DNA. A slightly hydrophilic, neutral-charged binding  
455 surface would permit weak interactions with a wide range of ligands.

456

457 Using these and other biophysical properties as input feature vectors, we were able to generate a  
458 generalizable protocol for binary comparisons between two distinct populations of Ig-domain se-

459 quences. This framework is able to successfully split all tested polyreactive and non-polyreactive  
460 antibody datasets. Care was taken to not overfit these data and a preliminary classifier built from  
461 this algorithm was able to identify the proper number of input vectors for each LDA application.  
462 While there are general features which best split the polyreactive and non-polyreactive antibod-  
463 ies in these datasets, including charge, hydrophobicity, and beta sheet propensity, these features  
464 alone are not sufficient to discriminate between the two populations. Instead, 75 vectors taken  
465 from the position-sensitive biophysical property matrix are necessary to properly split the groups,  
466 including both simple properties like charge, hydrophobicity, flexibility, and bulkiness and more  
467 carefully curated properties like the often used Kidera factors and the hotspot detecting variables  
468 of Liu et. al [39, 40, 54]. The inability to arrive at a core few biophysical properties that could  
469 effectively distinguish polyreactive and non-polyreactive antibodies necessitated the application of  
470 further approaches, namely information theory.

471

472 The tools provided by information theory proved to be effective in the present study. The classic  
473 approach to information theory considers some input, communication of this input across a noisy  
474 channel, and then reception of a meaningful message from the resultant output. We can think of  
475 the analogous case for these antibodies, whereby the sequence and structure of the antibodies can  
476 be seen as our input, the thermal noise inherent to biological systems can complicate biochemical  
477 interactions, and the necessary output is antigen recognition, i.e. binding between the antibody and  
478 the ligand. Focusing just on the antibody side of this communication channel, we determined the  
479 underlying loop diversity through the Shannon entropy of the polyreactive and non-polyreactive  
480 datasets. This diversity was found to be nearly equivalent while the mutual information, a metric  
481 of “crosstalk” across populations, between and within CDR loops was found to be increased in the  
482 heavy chain and decreased in the light chain of polyreactive antibodies. What this loop crosstalk  
483 entails physically is not immediately clear from these measurements.

484

485 The mutual information increase could come from gene usage being somehow coupled, amino acid  
486 usage coupling with the cognate ligand, or the amino acids directly interacting physically with each  
487 other. In some way, this crosstalk appears to be selected for in the polyreactive population. If this  
488 increase in mutual information manifests as an increase of charge-charge interactions, this could  
489 explain why there is a minimal change in net charge of antibodies between the two groups, yet a  
490 significant move towards neutrality in the CDR loops of polyreactive antibodies. The pairing of  
491 two charged groups would help move the binding surface of polyreactive antibodies towards a more  
492 “inoffensive” binding surface. A binding surface that is neither exceptionally hydrophobic nor hy-  
493 drophilic, and lacks a significant positive or negative charge, would represent a relatively appealing  
494 binding interface for a low-affinity interaction with a large array of diverse ligands. A patchwork

495 of hydrophobic and hydrophilic non-charged residues exposed to potential ligands would represent  
496 an ideal candidate polyreactive surface. The corresponding decrease in the mutual information  
497 between the light chain CDR loops of polyreactive antibodies could be caused by a de-emphasis in  
498 the involvement of these loops due to differential binding configurations of polyreactive ligands, as  
499 has been previously hypothesized [4, 55].

500

501 In addition to the insights into polyreactivity, the computational tools developed for this study  
502 are broadly applicable to future studies of large antibody or T cell receptor repertoires. One of  
503 the strengths of this approach is a decreased emphasis on structural information when crystal  
504 structures are unavailable. Computational prediction of loop conformation is difficult, and draw-  
505 ing inferences from incorrect models regarding side-chain interactions and positioning could be  
506 misleading. Reliable structural information on these polyreactive antibodies will be critical to a  
507 further understanding of the mechanisms of polyreactivity, including complex structures of antibod-  
508 ies bound to various ligands. In the high-throughput analysis of antibody sequences, our approach  
509 strikes a careful balance of the structural assumptions that should apply consistently across anti-  
510 body populations.

511

512 This streamlined analysis allows for the generation of each figure in this study to be applied to  
513 thousands of sequences in a matter of minutes. The classification capabilities of the software could  
514 prove particularly useful when comparing binary classes, such as T cell receptors or antibody se-  
515 quences derived from healthy and diseased tissue samples. To demonstrate this broad applicability,  
516 a database of nearly 500 therapeutic antibodies was analyzed using the linear analysis module of  
517 the software. This linear analysis highlighted the differences between polyreactivity of therapeutic  
518 antibodies and naturally derived antibodies. When applying this linear analysis to split approved  
519 and discontinued therapeutics, the biophysical property differences were less stark than those be-  
520 tween polyreactive and non-polyreactive antibodies. This makes intuitive sense, as therapeutics can  
521 be discontinued for a myriad of reasons, not necessarily due just to non-specificity or instability of  
522 the antibody.

523

524 Those therapeutic antibodies that were tested for polyreactivity appeared have little overlap with  
525 the polyreactivity of the naturally derived antibodies central to this study. This could be due to  
526 fundamental differences between the biophysical determinants of polyreactivity arising from anti-  
527 bodies generated *in vivo* vs *in vitro*, or could be due to experimental differences in the reporting  
528 of polyreactivity. While a single metric for polyreactivity, as is sometimes reported, is convenient,  
529 information on the binding of each sequence to all tested ligands is important. It is not necessarily  
530 obvious a higher average ELISA score corresponds to increased polyreactivity. Is an antibody that

531 binds to three targets with high affinity more polyreactive than one that binds to seven ligands with  
532 somewhat lower affinity? These nuances require as much transparency as possible when reporting  
533 experimental results.

534

535 Further experimental assays will be necessary to more comprehensively identify the underlying  
536 mechanisms of polyreactivity, including further sequencing and biochemical analysis of polyreac-  
537 tive and non-polyreactive antibodies. Antibodies specific to other pathogens or those from other  
538 organisms tested for polyreactivity will help form a more complete picture and improve the gener-  
539 ality of the results. As with any machine learning based approach, the classification algorithm is  
540 only as good as the data it is trained on. Adding further data in the training set, including more  
541 mutations and germline reversions that turn a polyreactive antibody non-polyreactive or vice-versa,  
542 will be critical for a comprehensive analysis of polyreactivity. Additionally, a more complete un-  
543 derstanding of the germinal center and the selection processes inherent to the affinity maturation  
544 process will assist in the determination of whether polyreactivity is a byproduct or a purposeful  
545 feature of the affinity maturation process.

546

547 The software generated for this study is publicly available as a python application (see Methods).  
548 The unique aspect of this software is its hybrid approach to position-sensitive amino acid sequence  
549 analysis. Structural information is implicitly encoded by the alignment strategy employed, yet  
550 these assumptions are weaker than those imposed by explicit structural prediction. Downstream  
551 analysis from this positional encoder is streamlined and can be generalized to analyze any binary  
552 or higher order classification problems. Acceptable inputs are not restricted to CDR loops of im-  
553 munoglobulins, and in fact the software has already been adapted for analyzing MHC-like molecules  
554 (data not shown). This software represents a strong addition to the existing toolkit for repertoire  
555 analysis of diverse molecular species.

## 556 **Methods**

### 557 **Software**

558 All analysis was performed in python, with code tested and finalized using Jupyter Notebooks [56].  
559 Figures were generated with matplotlib [57] or seaborn [58], while the majority of data analysis was  
560 carried out using Pandas [59], SciPy [60], and SciKit-learn [61]. All code will become available at  
561 <https://github.com/ctboughter/AIMS> upon publication, including the original Jupyter Notebooks  
562 used to generate the data in this manuscript as well as generalized versions for analysis of novel  
563 datasets.

## 564 Statistical Analysis

565 Error bars in all plots are provided by the standard deviation of 1000 bootstrap iterations. Statis-  
566 tical significance is calculated using either a two-sided nonparametric Studentized bootstrap or a  
567 two-sided nonparametric permutation test as outlined in “Bootstrap Methods and Their Applica-  
568 tion” [62]. For the Studentized bootstrap, the bootstrapped data are drawn from a resampling of  
569 the empirical distributions of each respective group with replacement. Practically, what this entails  
570 is a separation of the polyreactive and non-polyreactive antibodies into distinct matrices and using  
571 the Scikit-learn resample module to preserve the number of sequences in each population. From  
572 these resampled populations, all of the relevant properties used in this study were re-calculated.  
573 These 1000 iterations of each property were then compared to the empirical distribution to calculate  
574 a p-value using the relation:

$$p = \frac{1 + \#(z^2 \geq z_0^2)}{R + 1} \quad (4)$$

575 Here, we calculate the p-value by counting the number of bootstrap iterations where  $z^2$  is greater  
576 than or equal to  $z_0^2$ .  $z^2$  and  $z_0^2$  are Studentized test statistics taken from the bootstrap and empirical  
577 and distributions, respectively.  $R$  is the number of times this bootstrapping process is repeated.  
578 The general form of  $z$  is given by:

$$z = \frac{\bar{Y}_2 - \bar{Y}_1 - (\mu_2 - \mu_1)}{\left(\frac{\sigma_2^2}{n_2} - \frac{\sigma_1^2}{n_1}\right)^{1/2}} \quad (5)$$

579 Where  $\bar{Y}$  represents the bootstrapped sample mean,  $\mu$  is the observed sample mean from the origi-  
580 nal data,  $\sigma$  is the bootstrapped sample standard deviation, and  $n$  is the number of samples. Sample  
581 1 and 2 in this case correspond to polyreactive and non-polyreactive antibodies. To calculate  $z$   
582 for the empirical distribution ( $z_0$ ), the  $\bar{Y}$  terms are set to 0 and all other values correspond to the  
583 empirical rather than bootstrapped values.

584

585 To calculate p-values for differences in mutual information, the permutation test was used rather  
586 than the Studentized bootstrap. Here, the test statistic  $t$  is set to a simple difference of means, and  
587 rather than sampling with replacement from the empirical distribution, we randomly permute the  
588 data into “polyreactive” or “non-polyreactive” bins. We then count the number of permutations  
589 where the randomly permuted test statistic is greater than or equal to the empirical test statistic.  
590 This count then replaces the count ( $\#$ ) in the above equation for  $p$ .

## 591 Acknowledgements

592 This work was supported by the National Science Foundation through grant MCB-1517221 (BR  
593 and CTB), NIH NIBIB Training Grant T32 EB009412 (CTB), and NIH NIAID R01 AI115471,  
594 R01 AI147954 (EJA and CTB). We especially want to thank Cyril Planchais, Hugo Mouquet, and  
595 Michel Nussenzweig, for their assistance in procuring many of the antibody sequences used in this  
596 work. CTB would like to acknowledge the University of Chicago's Research Computing Center  
597 Midway resource, where some of these calculations were carried out, as well as Kristof Nolan,  
598 Caitlin Castro, Ryan Duncombe, and Nabil Faruk for their insightful discussions of the research.

## 599 Competing Interests

600 The authors declare no competing interests.

## 601 References

- 602 [1] Gabriel D. Victora and Michel C. Nussenzweig. Germinal Centers. *Annual Review of Im-*  
603 *munology*, 2012.
- 604 [2] Herman N. Eisen and Gregory W. Siskind. Variations in Affinities of Antibodies during the  
605 Immune Response. *Biochemistry*, 1964.
- 606 [3] D. McKean, K. Huppi, M. Bell, L. Staudt, W. Gerhard, and M. Weigert. Generation of  
607 antibody diversity in the immune response of BALB/c mice to influenza virus hemagglutinin.  
608 *Proceedings of the National Academy of Sciences of the United States of America*, 1984.
- 609 [4] Jordan D. Dimitrov, Cyril Planchais, Lubka T. Roumenina, Tchavdar L. Vassilev, Srinivas V.  
610 Kaveri, and Sebastien Lacroix-Desmazes. Antibody Polyreactivity in Health and Disease:  
611 Statu Variabilis. *The Journal of Immunology*, 2013.
- 612 [5] Adrian F. Ochsenbein, Thomas Fehr, Claudia Lutz, Mark Suter, Frank Brombacher, Hans  
613 Hengartner, and Rolf M. Zinkernagel. Control of early viral and bacterial distribution and  
614 disease by natural antibodies. *Science*, 1999.
- 615 [6] Hedda Wardemann, Sergey Yurasov, Anne Schaefer, James W. Young, Eric Meffre, and  
616 Michel C. Nussenzweig. Predominant autoantibody production by early human B cell pre-  
617 cursors. *Science*, 2003.
- 618 [7] Thomas Tiller, Makoto Tsuiji, Sergey Yurasov, Klara Velinzon, Michel C. Nussenzweig, and  
619 Hedda Wardemann. Autoreactivity in Human IgG+ Memory B Cells. *Immunity*, 2007.



- 620 [8] Hugo Mouquet, Johannes F. Scheid, Markus J. Zoller, Michelle Krogsgaard, Rene G. Ott,  
621 Shetha Shukair, Maxim N. Artyomov, John Pietzsch, Mark Connors, Florencia Pereyra,  
622 Bruce D. Walker, David D. Ho, Patrick C. Wilson, Michael S. Seaman, Herman N. Eisen,  
623 Arup K. Chakraborty, Thomas J. Hope, Jeffrey V. Ravetch, Hedda Wardemann, and Michel C.  
624 Nussenzweig. Polyreactivity increases the apparent affinity of anti-HIV antibodies by heteroli-  
625 gation. *Nature*, 2010.
- 626 [9] Julie Prigent, Valérie Lorin, Ayrin Kök, Thierry Hieu, Salomé Bourgeau, and Hugo Mouquet.  
627 Scarcity of autoreactive human blood IgA+ memory B cells. *European Journal of Immunology*,  
628 2016.
- 629 [10] Kristi Koelsch, Nai Ying Zheng, Qingzhao Zhang, Andrew Duty, Christina Helms, Melissa D.  
630 Mathias, Mathew Jared, Kenneth Smith, J. Donald Capra, and Patrick C. Wilson. Mature  
631 B cells class switched to IgD are autoreactive in healthy individuals. *Journal of Clinical*  
632 *Investigation*, 2007.
- 633 [11] Jeffrey J. Bunker, Steven A. Erickson, Theodore M. Flynn, Carole Henry, Jason C. Koval, Mar-  
634 lies Meisel, Bana Jabri, Dionysios A. Antonopoulos, Patrick C. Wilson, and Albert Bendelac.  
635 Natural polyreactive IgA antibodies coat the intestinal microbiota. *Science*, 2017.
- 636 [12] Cyril Planchais, Ayrin Kök, Alexia Kanyavuz, Valérie Lorin, Timothée Bruel, Florence Guivel-  
637 Benhassine, Tim Rollenske, Julie Prigent, Thierry Hieu, Thierry Prazuck, Laurent Lefrou,  
638 Hedda Wardemann, Olivier Schwartz, Jordan D. Dimitrov, Laurent Hocqueloux, and Hugo  
639 Mouquet. HIV-1 Envelope Recognition by Polyreactive and Cross-Reactive Intestinal B Cells.  
640 *Cell Reports*, 2019.
- 641 [13] Barton F. Haynes, Judith Fleming, E. William St. Clair, Herman Katinger, Gabriela Stiegler,  
642 Renate Kunert, James Robinson, Richard M. Scearce, Kelly Plonk, Herman F. Staats,  
643 Thomas L. Ortel, Hua Xin Liao, and S. Munir Alam. Immunology: Cardioliipin polyspecific  
644 autoreactivity in two broadly neutralizing HIV-1 antibodies. *Science*, 2005.
- 645 [14] Hugo Mouquet, Florian Klein, Johannes F. Scheid, Malte Warncke, John Pietzsch, Thiago Y.K.  
646 Oliveira, Klara Velinzon, Michael S. Seaman, and Michel C. Nussenzweig. Memory B cell  
647 antibodies to HIV-1 gp140 cloned from individuals infected with clade A and B viruses. *PLoS*  
648 *ONE*, 2011.
- 649 [15] Sarah F. Andrews, Yunping Huang, Kaval Kaur, Lyubov I. Popova, Irvin Y. Ho, Noel T. Pauli,  
650 Carole J. Henry Dunand, William M. Taylor, Samuel Lim, Min Huang, Xinyan Qu, Jane Hwei  
651 Lee, Marlene Salgado-Ferrer, Florian Krammer, Peter Palese, Jens Wrammert, Rafi Ahmed,  
652 and Patrick C. Wilson. Immune history profoundly affects broadly protective B cell responses  
653 to influenza. *Science Translational Medicine*, 2015.

- 654 [16] Julie Prigent, Annaëlle Jarossay, Cyril Planchais, Caroline Eden, Jérémy Dufloo, Ayrin  
655 Kök, Valérie Lorin, Oxana Vratskikh, Thérèse Couderc, Timothée Bruel, Olivier Schwartz,  
656 Michael S. Seaman, Oliver Ohlenschläger, Jordan D. Dimitrov, and Hugo Mouquet. Confor-  
657 mational Plasticity in Broadly Neutralizing HIV-1 Antibodies Triggers Polyreactivity. *Cell*  
658 *Reports*, 2018.
- 659 [17] Barton F. Haynes, Dennis R. Burton, and John R. Mascola. Multiple roles for HIV broadly  
660 neutralizing antibodies. *Science Translational Medicine*, 2019.
- 661 [18] Trevor A. Crowell, Donn J. Colby, Suteeraporn Pinyakorn, Carlo Sacdalan, Amélie Pagli-  
662 uzza, Jintana Intasan, Khunthalee Benjapornpong, Kamonkan Tangnaree, Nitiya Chomchey,  
663 Eugène Kroon, Mark S. de Souza, Sodsai Tovanabuttra, Morgane Rolland, Michael A. Eller,  
664 Dominic Paquin-Proulx, Diane L. Bolton, Andrey Tokarev, Rasmi Thomas, Hiroshi Takata,  
665 Lydie Trautmann, Shelly J. Krebs, Kayvon Modjarrad, Adrian B. McDermott, Robert T.  
666 Bailer, Nicole Doria-Rose, Bijal Patel, Robert J. Gorelick, Brandie A. Fullmer, Alexandra  
667 Schuetz, Pornsuk V. Grandin, Robert J. O’Connell, Julie E. Ledgerwood, Barney S. Graham,  
668 Randall Tressler, John R. Mascola, Nicolas Chomont, Nelson L. Michael, Merlin L. Robb, Nit-  
669 taya Phanuphak, Jintanat Ananworanich, Julie A. Ake, Siriwat Akapirat, Meera Bose, Evan  
670 Cale, Phillip Chan, Sararut Chanthaburanun, Nampueng Churikanont, Peter Dawson, Netsiri  
671 Dumrongpisutikul, Saowanit Getchalarat, Surat Jongrakthaitae, Krisada Jongsakul, Sukalaya  
672 Lerdlum, Sopark Manasnayakorn, Corinne McCullough, Mark Milazzo, Bessara Nuntapinit,  
673 Kier On, Madelaine Ouellette, Praphan Phanuphak, Eric Sanders-Buell, Nongluck Sangnoi,  
674 Shida Shangguan, Sunee Sirivichayakul, Nipattra Tragonlugsana, Rapee Trichavaroj, Sasi-  
675 wimol Ubolyam, Sandhya Vasana, Phandee Wattanaboonyongcharoen, and Thipvadee Yam-  
676 chuenpong. Safety and efficacy of VRC01 broadly neutralising antibodies in adults with  
677 acutely treated HIV (RV397): a phase 2, randomised, double-blind, placebo-controlled trial.  
678 *The Lancet HIV*, 2019.
- 679 [19] Gui Mei Li, Christopher Chiu, Jens Wrämmert, Megan McCausland, Sarah F. Andrews,  
680 Nai Ying Zheng, Jane Hwei Lee, Min Huang, Xinyan Qu, Srilatha Edupuganti, Mark Mulligan,  
681 Suman R. Das, Jonathan W. Yewdell, Aneesh K. Mehta, Patrick C. Wilson, and Rafi Ahmed.  
682 Pandemic H1N1 influenza vaccine induces a recall response in humans that favors broadly  
683 cross-reactive memory B cells. *Proceedings of the National Academy of Sciences of the United*  
684 *States of America*, 2012.
- 685 [20] Joshua S. Klein and Pamela J. Bjorkman. Few and far between: How HIV may be evading  
686 antibody avidity. *PLoS Pathogens*, 2010.

- 687 [21] Isidro Hötzel, Frank Peter Theil, Lisa J. Bernstein, Saileta Prabhu, Rong Deng, Leah Quintana,  
688 Jeff Lutman, Renuka Sibia, Pamela Chan, Daniela Bumbaca, Paul Fielder, Paul J. Carter, and  
689 Robert F. Kelley. A strategy for risk mitigation of antibodies with fast clearance. *mAbs*, 2012.
- 690 [22] Ryan L. Kelly, Tingwan Sun, Tushar Jain, Isabelle Caffry, Yao Yu, Yuan Cao, Heather  
691 Lynaugh, Michael Brown, Maximiliano Vásquez, K. Dane Wittrup, and Yingda Xu. High  
692 throughput cross-interaction measures for human IgG1 antibodies correlate with clearance  
693 rates in mice. *mAbs*, 2015.
- 694 [23] Ryan L. Kelly, Doris Le, Jessie Zhao, and K. Dane Wittrup. Reduction of Nonspecificity  
695 Motifs in Synthetic Antibody Libraries. *Journal of Molecular Biology*, 2018.
- 696 [24] Amita Datta-Mannan, Jirong Lu, Derrick R. Witcher, Donmienne Leung, Ying Tang, and  
697 Victor J. Wroblewski. The interplay of non-specific binding, target-mediated clearance and  
698 FcRn interactions on the pharmacokinetics of humanized antibodies. *mAbs*, 2015.
- 699 [25] Tushar Jain, Tingwan Sun, Stéphanie Durand, Amy Hall, Nga Rewa Houston, Juergen H.  
700 Nett, Beth Sharkey, Beata Bobrowicz, Isabelle Caffry, Yao Yu, Yuan Cao, Heather Lynaugh,  
701 Michael Brown, Hemanta Baruah, Laura T. Gray, Eric M. Krauland, Yingda Xu, Maximiliano  
702 Vásquez, and K. Dane Wittrup. Biophysical properties of the clinical-stage antibody landscape.  
703 *Proceedings of the National Academy of Sciences of the United States of America*, 2017.
- 704 [26] Matthew I.J. Raybould, Claire Marks, Konrad Krawczyk, Bruck Taddese, Jaroslaw Nowak,  
705 Alan P. Lewis, Alexander Bujotzek, Jiye Shi, and Charlotte M. Deane. Five computational de-  
706 velopability guidelines for therapeutic antibody profiling. *Proceedings of the National Academy  
707 of Sciences of the United States of America*, 2019.
- 708 [27] Vikas K. Sharma, Thomas W. Patapoff, Bruce Kabakoff, Satyan Pai, Eric Hilario, Boyan  
709 Zhang, Charlene Li, Oleg Borisov, Robert F. Kelley, Ilya Chorny, Joe Z. Zhou, Ken A. Dill,  
710 and Trevor E. Swartz. In silico selection of therapeutic antibodies for development: Viscosity,  
711 clearance, and chemical stability. *Proceedings of the National Academy of Sciences of the  
712 United States of America*, 2014.
- 713 [28] Tushar Jain, Todd Boland, Asparouh Lilov, Irina Burnina, Michael Brown, Yingda Xu, and  
714 Maximiliano Vásquez. Prediction of delayed retention of antibodies in hydrophobic interaction  
715 chromatography from sequence using machine learning. *Bioinformatics*, 2017.
- 716 [29] Olga Obrezanova, Andreas Arnell, Ramón Gómez De La Cuesta, Maud E. Berthelot,  
717 Thomas R.A. Gallagher, Jesús Zurdo, and Yvette Stallwood. Aggregation risk prediction  
718 for antibodies and its application to biotherapeutic development. *mAbs*, 2015.

- 719 [30] Charles G. Starr and Peter M. Tessier. Selecting and engineering monoclonal antibodies with  
720 drug-like specificity, 2019.
- 721 [31] Maxime Lecerf, Alexia Kanyavuz, Sébastien Lacroix-Desmazes, and Jordan D. Dimitrov. Se-  
722 quence features of variable region determining physicochemical properties and polyreactivity  
723 of therapeutic antibodies. *Molecular Immunology*, 2019.
- 724 [32] Lilia A. Rabia, Yulei Zhang, Seth D. Ludwig, Mark C. Julian, and Peter M. Tessier. Net charge  
725 of antibody complementarity-determining regions is a key predictor of specificity. *Protein*  
726 *engineering, design & selection : PEDS*, 2018.
- 727 [33] Sara Birtalan, Yingnan Zhang, Frederic A. Fellouse, Lihua Shao, Gabriele Schaefer, and  
728 Sachdev S. Sidhu. The Intrinsic Contributions of Tyrosine, Serine, Glycine and Arginine  
729 to the Affinity and Specificity of Antibodies. *Journal of Molecular Biology*, 2008.
- 730 [34] Yasaman Karami, Julien Rey, Guillaume Postic, Samuel Murail, Pierre Tufféry, and Sjoerd J.  
731 De Vries. DaReUS-Loop: a web server to model multiple loops in homology models. *Nucleic*  
732 *Acids Research*, 2019.
- 733 [35] Karlynn E. Neu, Jenna J. Guthmiller, Min Huang, Jennifer La, Marcos C. Vieira, Kangchon  
734 Kim, Nai Ying Zheng, Mario Cortese, Micah E. Tepora, Natalie J. Hamel, Karla Thatcher  
735 Rojas, Carole Henry, Dustin Shaw, Charles L. Dulberger, Bali Pulendran, Sarah Cobey, Aly A.  
736 Khan, and Patrick C. Wilson. Spec-seq unveils transcriptional subpopulations of antibody-  
737 secreting cells following influenza vaccination. *Journal of Clinical Investigation*, 2019.
- 738 [36] Jens Wrammert, Dimitrios Koutsouanos, Gui Mei Li, Srilatha Edupuganti, Jianhua Sui,  
739 Michael Morrissey, Megan McCausland, Ioanna Skountzou, Mady Hornig, W. Ian Lipkin,  
740 Aneesh Mehta, Behzad Razavi, Carlos Del Rio, Nai Ying Zheng, Jane Hwei Lee, Min Huang,  
741 Zahida Ali, Kaval Kaur, Sarah Andrews, Rama Rao Amara, Youliang Wang, Suman Ranjan  
742 Das, Christopher David O'Donnell, Jon W. Yewdell, Kanta Subbarao, Wayne A. Marasco,  
743 Mark J. Mulligan, Richard Compans, Rafi Ahmed, and Patrick C. Wilson. Broadly cross-  
744 reactive antibodies dominate the human B cell response against 2009 pandemic H1N1 influenza  
745 virus infection. *Journal of Experimental Medicine*, 2011.
- 746 [37] Pradyot Dash, Andrew J. Fiore-Gartland, Tomer Hertz, George C. Wang, Shalini Sharma,  
747 Aisha Souquette, Jeremy Chase Crawford, E. Bridie Clemens, Thi H.O. Nguyen, Katherine  
748 Kedzierska, Nicole L. La Gruta, Philip Bradley, and Paul G. Thomas. Quantifiable predictive  
749 features define epitope-specific T cell receptor repertoires. *Nature*, 2017.
- 750 [38] Jian Ye, Ning Ma, Thomas L. Madden, and James M. Ostell. IgBLAST: an immunoglobulin  
751 variable domain sequence analysis tool. *Nucleic acids research*, 2013.

- 752 [39] Akinori Kidera, Yasuo Konishi, Masahito Oka, Tatsuo Ooi, and Harold A. Scheraga. Statistical  
753 analysis of the physical properties of the 20 naturally occurring amino acids. *Journal of Protein*  
754 *Chemistry*, 1985.
- 755 [40] Quanya Liu, Peng Chen, Bing Wang, Jun Zhang, and Jinyan Li. Hot spot prediction in  
756 protein-protein interactions by an ensemble system. *BMC Systems Biology*, 2018.
- 757 [41] Matthew Barker and William Rayens. Partial least squares for discrimination. *Journal of*  
758 *Chemometrics*, 2003.
- 759 [42] Marli Tenório Cordeiro, Ulisses Braga-Neto, Rita Maria Ribeiro Nogueira, and Ernesto T.A.  
760 Marques. Reliable classifier to differentiate primary and secondary acute dengue infection  
761 based on IgG ELISA. *PLoS ONE*, 2009.
- 762 [43] Yuqian Ma, David Vilanova, Kerem Atalar, Olivier Delfour, Jonathan Edgeworth, Marlies Os-  
763 termann, Maria Hernandez-Fuentes, Sandrine Razafimahatratra, Bernard Michot, David H.  
764 Persing, Ingrid Ziegler, Bianca Törös, Paula Mölling, Per Olcén, Richard Beale, and Gra-  
765 ham M. Lord. Genome-Wide Sequencing of Cellular microRNAs Identifies a Combinatorial  
766 Expression Signature Diagnostic of Sepsis. *PLoS ONE*, 2013.
- 767 [44] Zhihua Qiao, Lan Zhou, and Jianhua Z. Huang. Sparse linear discriminant analysis with  
768 applications to high dimensional low sample size data. *IAENG International Journal of Applied*  
769 *Mathematics*, 2009.
- 770 [45] Claude E. Shannon. The Mathematical Theory of Communication. *The Bell System Technical*  
771 *Journal*, 1948.
- 772 [46] Ramón Román-Roldán, Pedro Bernaola-Galván, and José L. Oliver. Application of information  
773 theory to DNA sequence analysis: A review. *Pattern Recognition*, 1996.
- 774 [47] Raymond Cheong, Alex Rhee, Chiaochun Joanne Wang, Ilya Nemenman, and Andre  
775 Levchenko. Information transduction capacity of noisy biochemical signaling networks. *Sci-*  
776 *ence*, 2011.
- 777 [48] Susana Vinga. Information theory applications for biological sequence analysis. *Briefings in*  
778 *Bioinformatics*, 2014.
- 779 [49] Thierry Mora, Aleksandra M. Walczak, William Bialek, and Curtis G. Callan. Maximum  
780 entropy models for antibody diversity. *Proceedings of the National Academy of Sciences of the*  
781 *United States of America*, 2010.

- 782 [50] Anand Murugan, Thierry Mora, Aleksandra M. Walczak, and Curtis G. Callan. Statistical inference of the generation probability of T-cell receptors from sequence repertoires. *Proceedings of the National Academy of Sciences of the United States of America*, 2012.
- 783
- 784
- 785 [51] James R.R. Whittle, Ruijun Zhang, Surender Khurana, Lisa R. King, Jody Manischewitz, Hana Golding, Philip R. Dormitzer, Barton F. Haynes, Emmanuel B. Walter, M. Anthony Moody, Thomas B. Kepler, Hua Xin Liao, and Stephen C. Harrison. Broadly neutralizing human antibody that recognizes the receptor-binding pocket of influenza virus hemagglutinin. *Proceedings of the National Academy of Sciences of the United States of America*, 2011.
- 786
- 787
- 788
- 789
- 790 [52] James Dunbar, Konrad Krawczyk, Jinwoo Leem, Terry Baker, Angelika Fuchs, Guy Georges, Jiye Shi, and Charlotte M. Deane. SAbDab: The structural antibody database. *Nucleic Acids Research*, 2014.
- 791
- 792
- 793 [53] Matthew I.J. Raybould, Claire Marks, Alan P. Lewis, Jiye Shi, Alexander Bujotzek, Bruck Taddese, and Charlotte M. Deane. Thera-SAbDab: the Therapeutic Structural Antibody Database. *Nucleic acids research*, 2020.
- 794
- 795
- 796 [54] Mauno Vihinen, Esa Torkkila, and Pentti Riihonen. Accuracy of protein flexibility predictions. *Proteins: Structure, Function, and Bioinformatics*, 1994.
- 797
- 798 [55] Dhruv K. Sethi, Anupriya Agarwal, Venkatasamy Manivel, Kanury V.S. Rao, and Dinakar M. Salunke. Differential Epitope Positioning within the Germline Antibody Paratope Enhances Promiscuity in the Primary Immune Response. *Immunity*, 2006.
- 799
- 800
- 801 [56] Thomas Kluyver, Benjamin Ragan-kelley, Fernando Pérez, Brian Granger, Matthias Bussonnier, Jonathan Frederic, Kyle Kelley, Jessica Hamrick, Jason Grout, Sylvain Corlay, Paul Ivanov, Damián Avila, Safia Abdalla, Carol Willing, and Jupyter Development Team. Jupyter Notebooks—a publishing format for reproducible computational workflows. In *Positioning and Power in Academic Publishing: Players, Agents and Agendas*. 2016.
- 802
- 803
- 804
- 805
- 806 [57] John D. Hunter. Matplotlib: A 2D graphics environment. *Computing in Science and Engineering*, 2007.
- 807
- 808 [58] Erik Ziegler, Yury V. Zaytsev, Michael T. Waskom, Olga Botvinnik, Paul Hobson, John B. Cole, Yaroslav Halchenko, Stephan Hoyer, Alistair Miles, Tom Augspurger, Tal Yarkoni, Tobias Megies, Luis Pedro Coelho, Daniel Wehner, and Michael Waskom. seaborn: v0.5.0. *zenodo*, 2014.
- 809
- 810
- 811
- 812 [59] Wes McKinney and PyData Development Team. Pandas - Powerful Python Data Analysis Toolkit. *Pandas - Powerful Python Data Analysis Toolkit*, 2015.
- 813

- 814 [60] Pauli Virtanen, Ralf Gommers, Travis E. Oliphant, Matt Haberland, Tyler Reddy, David  
815 Cournapeau, Evgeni Burovski, Pearu Peterson, Warren Weckesser, Jonathan Bright, Stéfan J.  
816 van der Walt, Matthew Brett, Joshua Wilson, K. Jarrod Millman, Nikolay Mayorov, An-  
817 drew R.J. Nelson, Eric Jones, Robert Kern, Eric Larson, C. J. Carey, İlhan Polat, Yu Feng,  
818 Eric W. Moore, Jake VanderPlas, Denis Laxalde, Josef Perktold, Robert Cimrman, Ian Hen-  
819 riksen, E. A. Quintero, Charles R. Harris, Anne M. Archibald, Antônio H. Ribeiro, Fabian Pe-  
820 dregosa, Paul van Mulbregt, Aditya Vijaykumar, Alessandro Pietro Bardelli, Alex Rothberg,  
821 Andreas Hilboll, Andreas Kloeckner, Anthony Scopatz, Antony Lee, Ariel Rokem, C. Nathan  
822 Woods, Chad Fulton, Charles Masson, Christian Häggström, Clark Fitzgerald, David A.  
823 Nicholson, David R. Hagen, Dmitrii V. Pasechnik, Emanuele Olivetti, Eric Martin, Eric Wieser,  
824 Fabrice Silva, Felix Lenders, Florian Wilhelm, G. Young, Gavin A. Price, Gert Ludwig Ingold,  
825 Gregory E. Allen, Gregory R. Lee, Hervé Audren, Irvin Probst, Jörg P. Dietrich, Jacob Sil-  
826 terra, James T. Webber, Janko Slavič, Joel Nothman, Johannes Buchner, Johannes Kulick,  
827 Johannes L. Schönberger, José Vinícius de Miranda Cardoso, Joscha Reimer, Joseph Harring-  
828 ton, Juan Luis Cano Rodríguez, Juan Nunez-Iglesias, Justin Kuczynski, Kevin Tritz, Martin  
829 Thoma, Matthew Newville, Matthias Kümmerer, Maximilian Bolingbroke, Michael Tartre,  
830 Mikhail Pak, Nathaniel J. Smith, Nikolai Nowaczyk, Nikolay Shebanov, Oleksandr Pavlyk,  
831 Per A. Brodtkorb, Perry Lee, Robert T. McGibbon, Roman Feldbauer, Sam Lewis, Sam Ty-  
832 gier, Scott Sievert, Sebastiano Vigna, Stefan Peterson, Surhud More, Tadeusz Pudlik, Takuya  
833 Oshima, Thomas J. Pingel, Thomas P. Robitaille, Thomas Spura, Thouis R. Jones, Tim Cera,  
834 Tim Leslie, Tiziano Zito, Tom Krauss, Utkarsh Upadhyay, Yaroslav O. Halchenko, and Yoshiki  
835 Vázquez-Baeza. SciPy 1.0: fundamental algorithms for scientific computing in Python. *Nature*  
836 *Methods*, 2020.
- 837 [61] Fabian Pedregosa, Gael Varoquaux, Alexandre Gramfort, Vincent Michel, Bertrand Thirion,  
838 Olivier Grisel, Mathieu Blondel, Peter Prettenhofer, Ron Weiss, Vincent Dubourg, Jake  
839 Vanderplas, Alexandre Passos, David Cournapeau, Matthieu Brucher, Matthieu Perrot, and  
840 Édouard Duchesnay. Scikit-learn: Machine learning in Python. *Journal of Machine Learning*  
841 *Research*, 2011.
- 842 [62] A. C. Davison and D. V. Hinkley. *Bootstrap Methods and their Application*. 1997.

843 Supplemental Figures

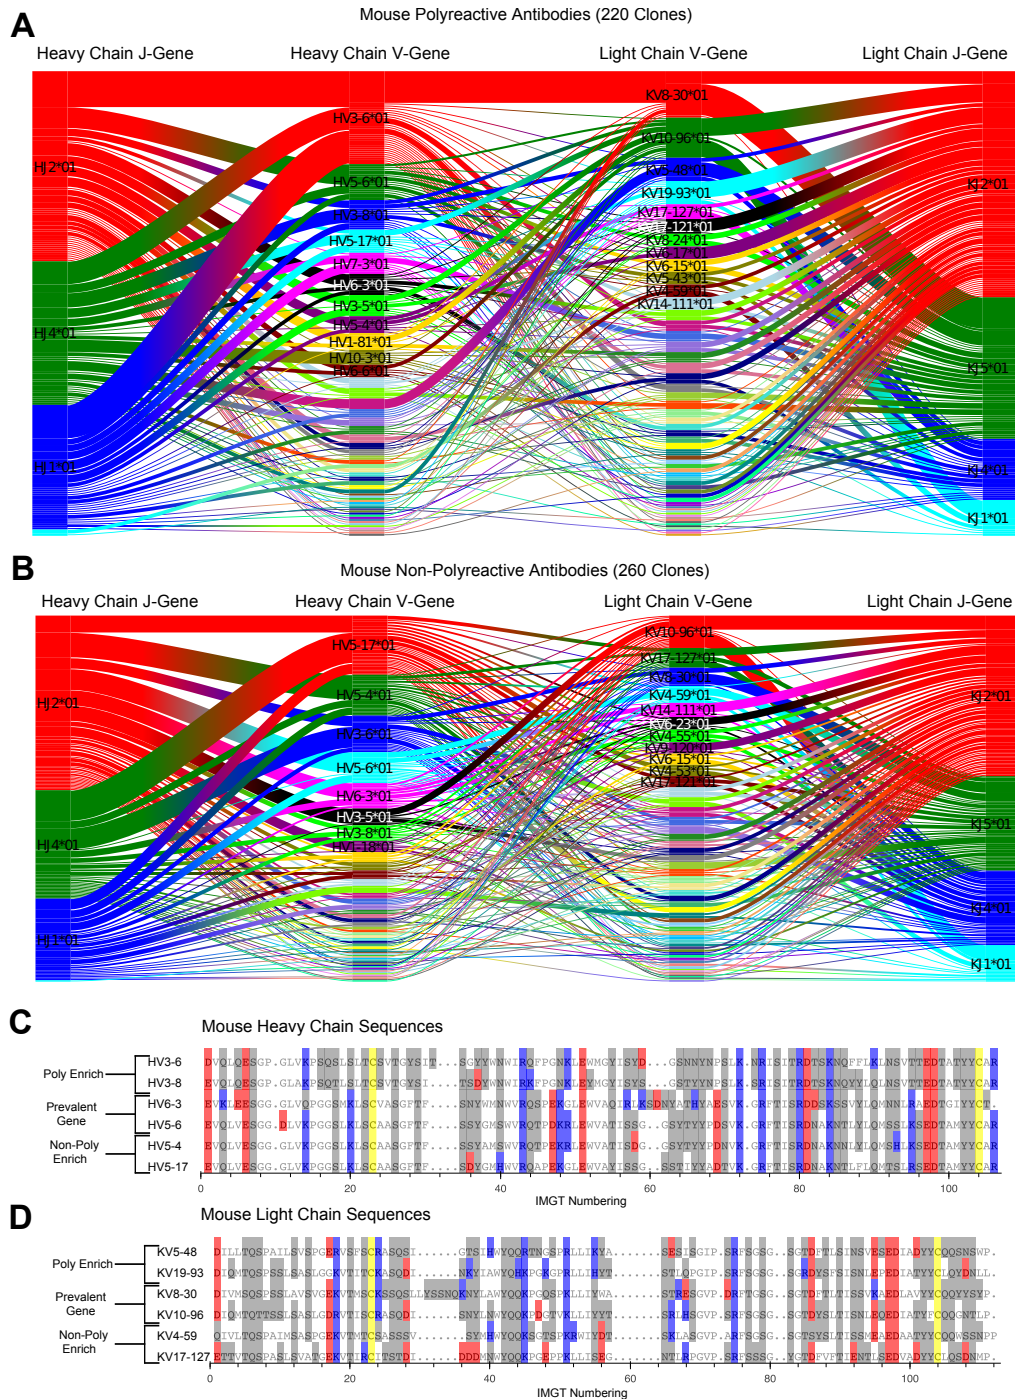

Figure S1: Gene usage plots comparing mouse polyreactive (A) and (B) non-polyreactive clones including J-gene usage. Colors represent the most commonly used genes in each individual dataset, with colors not necessarily consistent between panels. Sequence alignments comparing the amino acids of these most common genes for polyreactive and non-polyreactive mouse antibodies for the heavy chain (C) and the light chain (D). Prevalent genes are present in both populations. Cysteine is colored yellow, hydrophobic amino acids are colored white, hydrophilic amino acids are colored grey, and positively or negatively charged amino acids are colored blue or red, respectively.



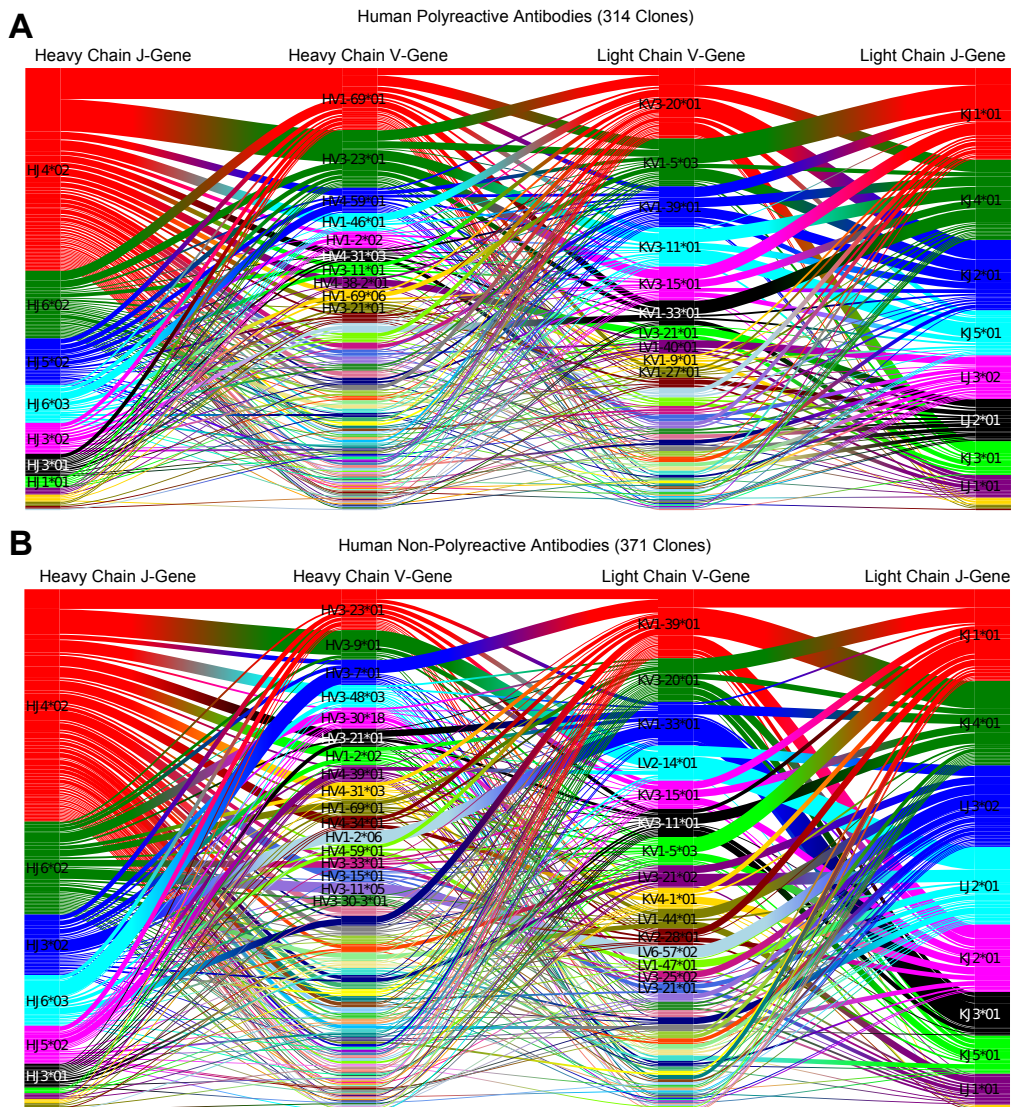

Figure S2: Gene usage plots comparing human polyreactive (A) and (B) non-polyreactive clones including J-gene usage. Data is the same as that in Figure 1A and 1B, with a different color scheme used for genes. Colors represent the most commonly used genes in each individual dataset, with colors not necessarily consistent between panels.

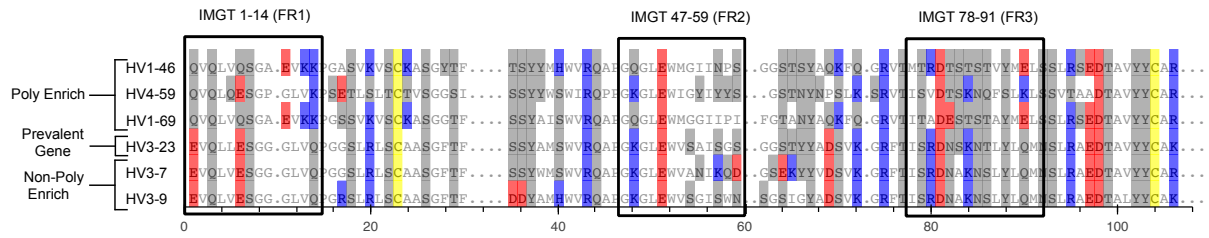

Figure S3: Sequence alignment of the most polyreactive genes compared to the most prevalent gene and the most non-polyreactive genes. Alignment uses IMGT numbering scheme and displays the entirety of the heavy chain variable gene's amino acid sequence. Boxes represent the sections highlighted in Figure 1C. Cysteine is colored yellow, hydrophobic amino acids are colored white, hydrophilic amino acids are colored grey, and positively or negatively charged amino acids are colored blue or red, respectively.

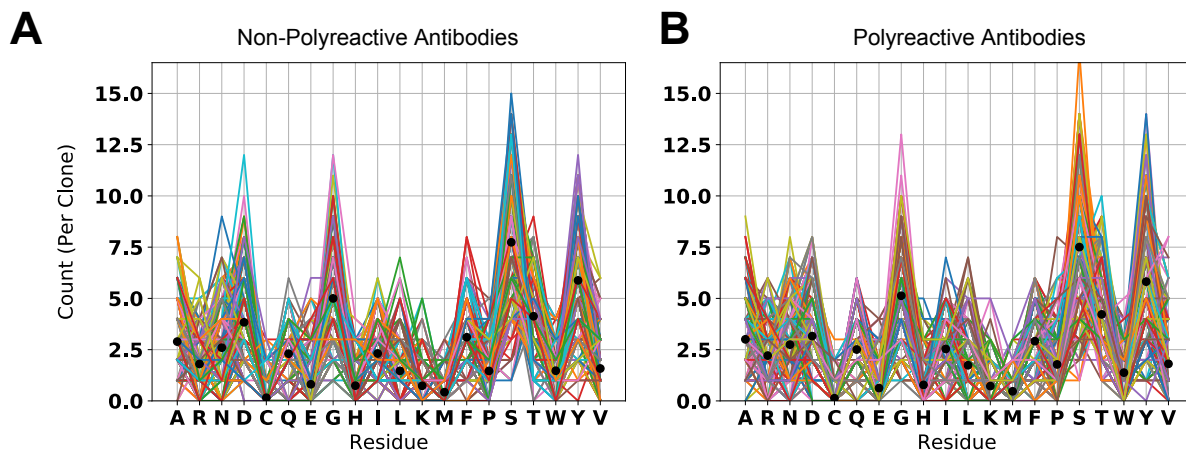

Figure S4: Amino acid usage plot highlighting the occurrence of each amino acid in non-polyreactive (A) and polyreactive (B) CDR loops. Each line represents an individual clone, and each point along the line represents the count of each amino in that given clone. Black dots represent the average counts per clone.

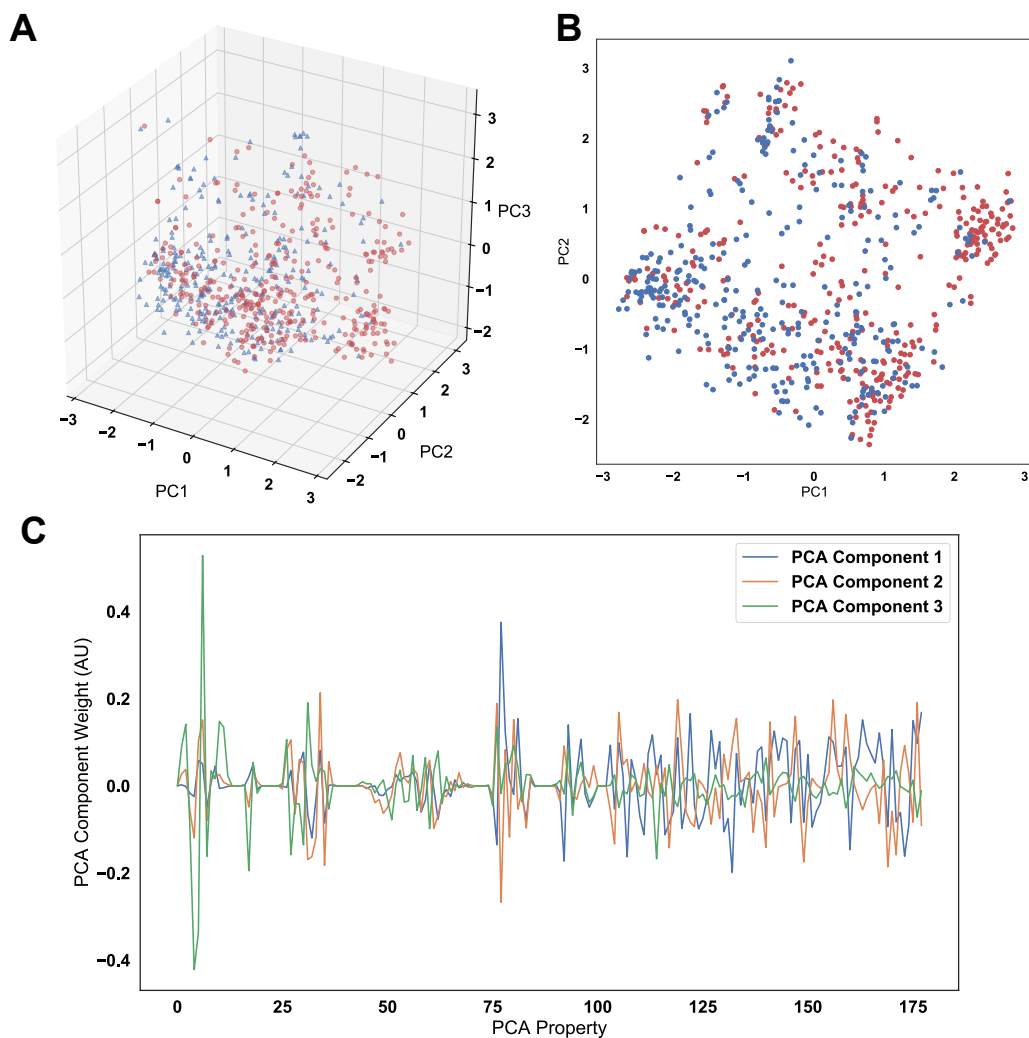

Figure S5: Principal component analysis (PCA) applied to the full amino acid usage matrix and the top 75 discriminating vectors used for linear discriminant analysis shows an inability to distinguish the two populations when showing the first three (A) and first two (B) principal components. (C) Examination of the weights of these first three components shows there is no one property disproportionately contributing to the variance in the dataset. The vector normal of each set of weights is equivalent to 1. The red dot represents the transition from the simple property-based representation of each set of CDR loops to the top 75 discriminating properties.

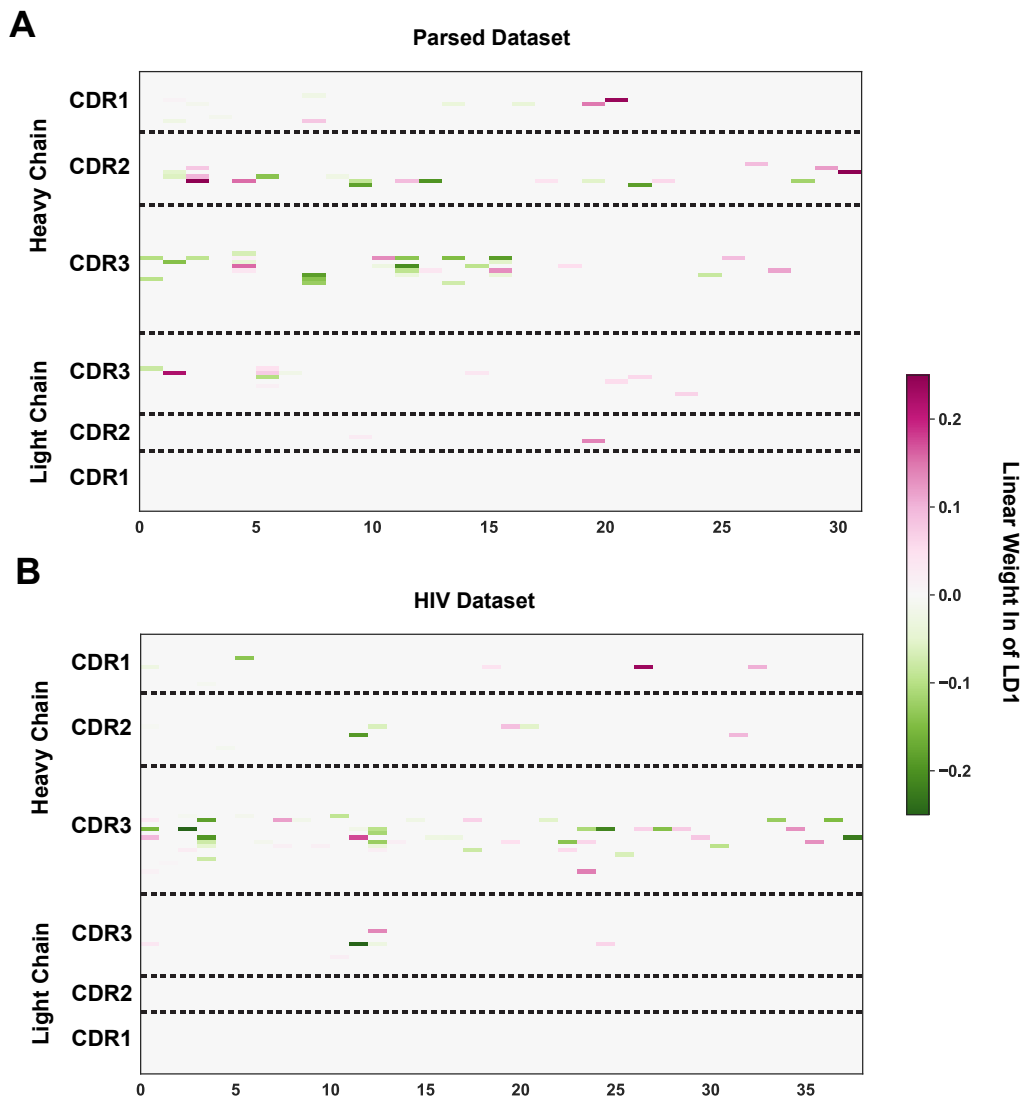

Figure S6: The complete representation of the 75 linear weights that most effectively separate polyreactive and non-polyreactive sequences in the parsed complete dataset (A) and the parsed HIV dataset (B). The x-axes each represent a single biophysical property selected after parsing down the full feature list using a maximal difference algorithm and a correlation analysis.

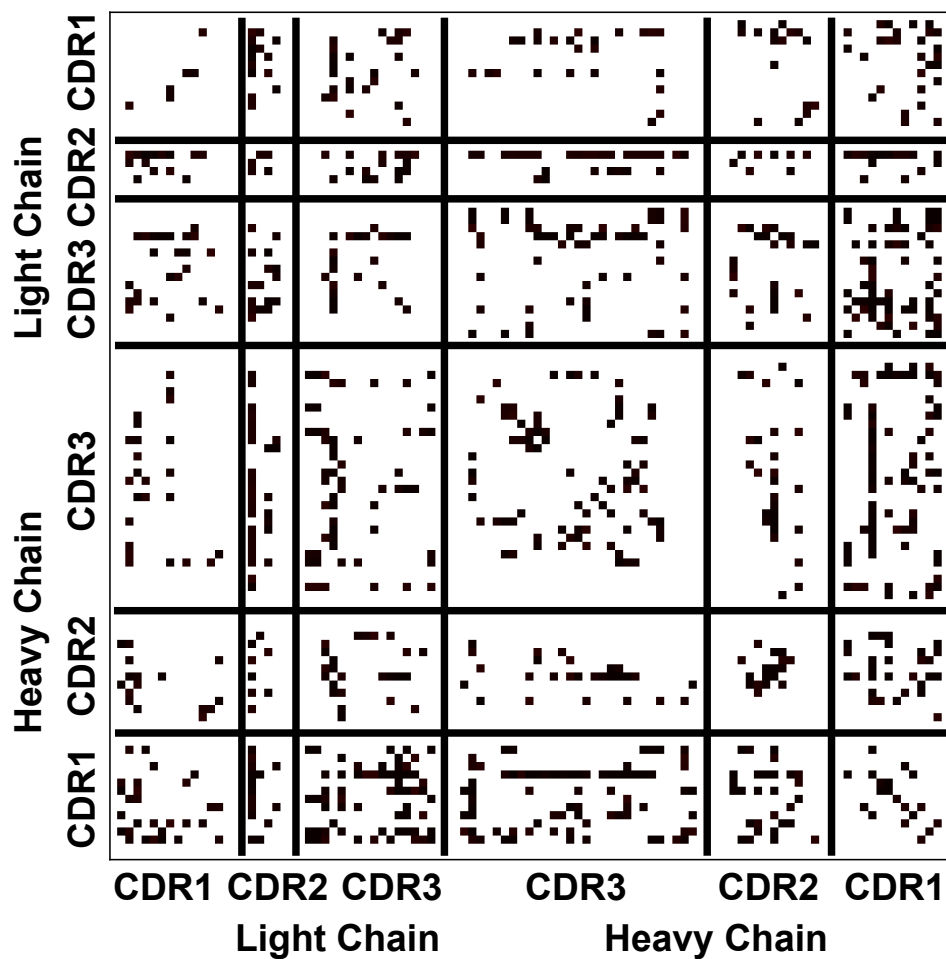

Figure S7: The statistical significance of the values reported in Figure 5C. Each black dot represents statistical significance ( $p \leq 0.05$ ) at that given location. Significance was calculated using a non-parametric permutation test.

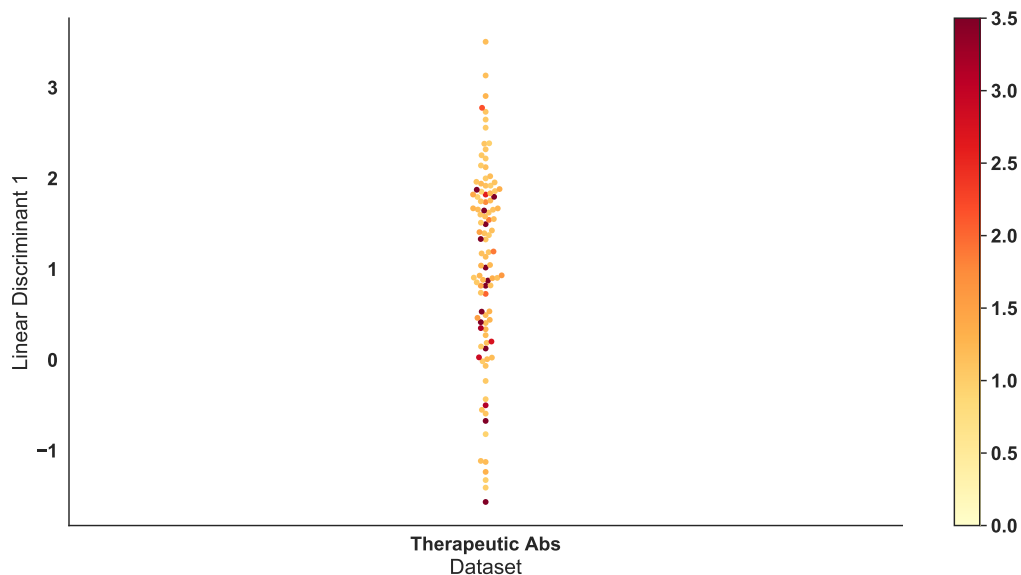

Figure S8: A mapping of the therapeutic antibodies tested for polyreactivity by Jain & Sun et. al. (PNAS 2017) onto the linear discriminant trained on the parsed dataset of naturally derived polyreactive antibodies. The linear discriminant here is identical to that in Figure 6A, while the sequences plotted above are subset of the “Therapeutic Antibodies” in that same panel. These therapeutic antibodies were tested for polyreactivity using an ELISA based assay aggregated into a single value reported in the original study. These values are represented in this plot by color, with the color bar providing the scale.

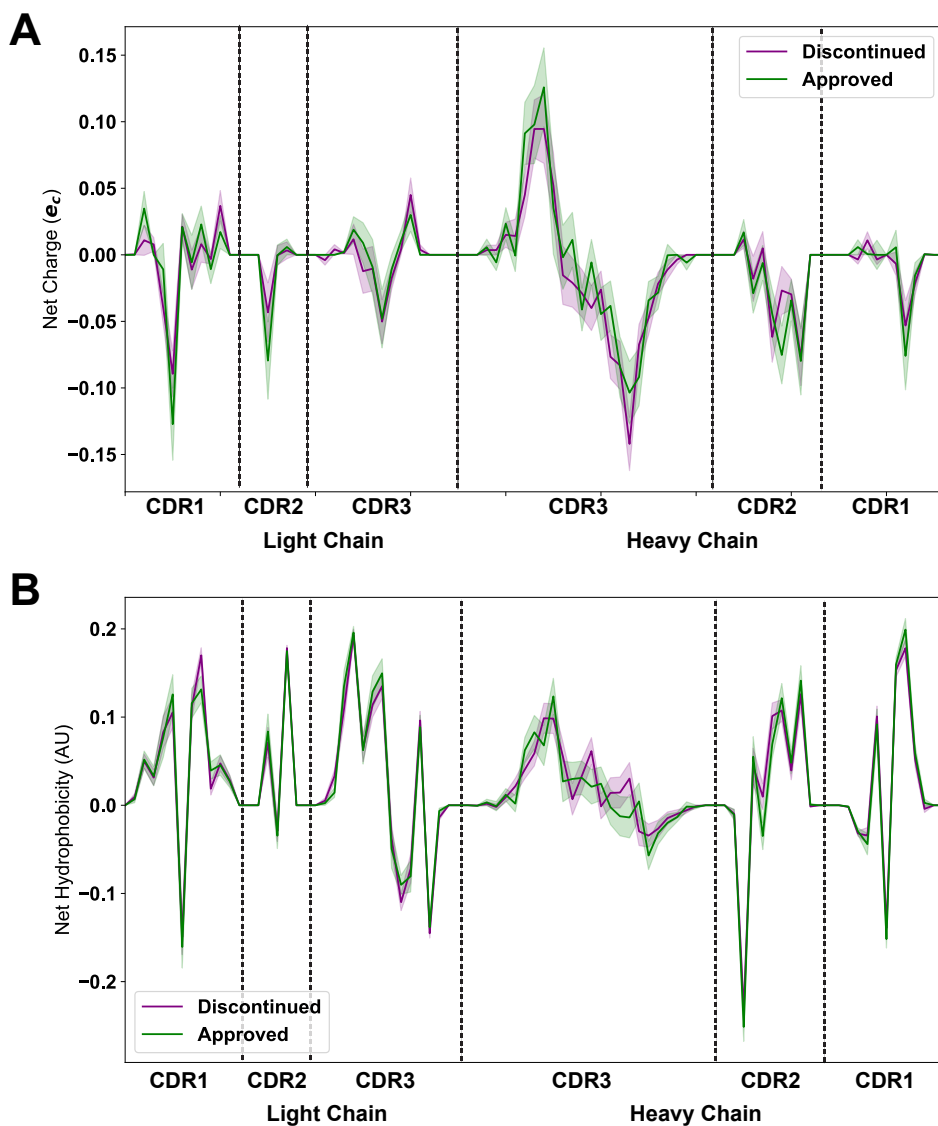

Figure S9: Plotting the average net charge (A) and net hydrophobicity (B) as a function of distance of discontinued and accepted therapeutic antibodies highlights a lack of significant differences. Light shadow around lines represents standard deviation obtained via bootstrapping.

844 Table S1: List of all of biophysical properties used for this study. For hotspot detecting variables  
845 (HS) a simplified form of the description is used. For more in-depth descriptions, the original  
846 reference should be used.

| Property Shorthand | Description                                         |
|--------------------|-----------------------------------------------------|
| Phob1              | Hydrophobicity Scale [-1,1]                         |
| Charge             | Charge [ec]                                         |
| Phob2              | Octanol-Interface Hydrophobicity Scale              |
| Bulk               | Side-Chain Bulkiness                                |
| Flex               | Side-Chain Flexibility                              |
| KD1                | Helix/Bend Preference                               |
| KD2                | Side-Chain Size                                     |
| KD3                | Extended Structure Preference                       |
| KD4                | Hydrophobicity                                      |
| KD5                | Double-bend Preference                              |
| KD6                | Flat Extended Preference                            |
| KD7                | Partial Specific Volume                             |
| KD8                | Occurrence in alpha-region                          |
| KD9                | pK-C                                                |
| KD10               | Surrounding Hydrophobicity                          |
| HS1                | Normalized Positional Residue Freq at Helix C-term  |
| HS2                | Normalized Positional Residue Freq at Helix C4-term |
| HS3                | Spin-spin coupling constants                        |
| HS4                | Random Parameter                                    |
| HS5                | pK-N                                                |
| HS6                | Alpha-Helix Indices for Beta-Proteins               |
| HS7                | Linker Propensity from 2-Linker Dataset             |
| HS8                | Linker Propensity from Long Dataset                 |
| HS9                | Normalized Relative Freq of Helix End               |
| HS10               | Normalized Relative Freq of Double Bend             |
| HS11               | pK-COOH                                             |
| HS12               | Relative Mutability                                 |
| HS13               | Kerr-Constant Increments                            |
| HS14               | Net Charge                                          |
| HS15               | Norm Freq Zeta-R                                    |
| HS16               | Hydropathy Scale                                    |
| HS17               | Ratio of Average Computed Composition               |



|      |                                                 |
|------|-------------------------------------------------|
| HS18 | Intercept in Regression Analysis                |
| HS19 | Correlation coefficient in Reg Anal             |
| HS20 | Weights for Alpha-Helix at window pos           |
| HS21 | Weights for Beta-sheet at window pos -3         |
| HS22 | Weights for Beta-sheet at window pos 3          |
| HS23 | Weights for coil at win pos -5                  |
| HS24 | Weights coil win pos -4                         |
| HS25 | Weights coil win pos 6                          |
| HS26 | Avg Rel Frac occur in AL                        |
| HS27 | Avg Rel Frac occur in EL                        |
| HS28 | Avg Rel Frac occur in A0                        |
| HS29 | Rel Pref at N                                   |
| HS30 | Rel Pref at N1                                  |
| HS31 | Rel Pref at N2                                  |
| HS32 | Rel Pref at C1                                  |
| HS33 | Rel Pref at C                                   |
| HS34 | Information measure for extended without H-bond |
| HS35 | Information measure for C-term turn             |
| HS36 | Loss of SC hydrophathy by helix formation       |
| HS37 | Principal Component 4 (Sneath 1966)             |
| HS38 | Zimm-Bragg Parameter                            |
| HS39 | Normalized Freq of ZetaR                        |
| HS40 | Rel Pop Conformational State A                  |
| HS41 | Rel Pop Conformational State C                  |
| HS42 | Electron-Ion Interaction Potential              |
| HS43 | Free energy change of epsI to epsEx             |
| HS44 | Free energy change of alphaRI to alphaRH        |
| HS45 | Hydrophobicity coeff                            |
| HS46 | Principal Property Value z3 Wold et. al. 1987   |

---
